# Supplementary material for: Effect of lower sodium intake on health: systematic review and meta-analyses
Source: PubMed Central journal article supplement — BMJ. 2013 Apr 4;346:f1326. doi: 10.1136/bmj.f1326 (PMC4816261; doi:10.1136/bmj.f1326), 2013-04-04

**Online Supporting Materials for manuscript entitled  
Effect of lower sodium intake on health: systematic review and meta-analyses**

Nancy J Aburto<sup>1</sup>, Anna Ziolkovska<sup>2</sup>, Lee Hooper<sup>3</sup>, Paul Elliott<sup>4</sup>, Francesco Cappuccio<sup>5</sup>, Joerg Meerpohl<sup>6</sup>

<sup>1</sup> *Nutrition Policy and Scientific Advice Unit, Department of Nutrition for Health and Development, World Health Organization, 20, Avenue Appia, 1211 Geneva 27, Switzerland*

<sup>2</sup> *Intern, Department of Nutrition for Health and Development, World Health Organization, Geneva, Switzerland from October 2011 to March 2012.*

<sup>3</sup> *Norwich Medical School, University of East Anglia, Norwich NR4 7TJ, United Kingdom*

<sup>4</sup> *Department of Epidemiology and Biostatistics and MRC-HPA Centre for Environment and Health, Imperial College London, UK*

<sup>5</sup> *University of Warwick, World Health Organization Collaborating Centre for Nutrition, Warwick Medical School, Coventry CV2 2DX, United Kingdom*

<sup>6</sup> *German Cochrane Centre, Institute of Medical Biometry and Medical Informatics, University Medical Center Freiburg, Berliner Allee 29, 79110 Freiburg, Germany*

## OSM 1: Electronic search strategy

---

### **A. Search Strategy for studies reporting blood pressure, blood lipids, catecholamine levels, and other potential adverse effects**

We searched for studies in two phases. In the first phase, we searched for high-quality systematic reviews on reduced sodium consumption that included the outcomes of interest. If the inclusion criteria for an identified review were similar or equivalent to those of the current review, we used the reference list from that review as a list of potential studies, and completed the list by searching the literature published subsequent to the search date used in that review. In some cases, we contacted the original authors of the systematic review and requested the data in order to explore the data in such a way as to answer our objectives.

In the second phase, we undertook a complete search for data published since the date of the search performed in the identified systematic review.

#### **Electronic databases**

We searched the following electronic databases:

- The Cochrane Central Register of Controlled Trials;
- MEDLINE;
- EMBASE;
- WHO International Clinical Trials Registry Platform;
- The Latin American and Caribbean Health Science Literature Database.

#### **Other resources**

We also searched for further trials on the WHO web site<sup>1</sup> and in the reference lists of identified papers. For assistance in identifying ongoing or unpublished studies, we contacted the WHO Department of Nutrition for Health and Development and other international partners, such as academic and research institutions with a known interest in this field.

#### Blood Pressure (Adults)

Identified Cochrane systematic review by He and MacGregor 2008.

- 1) Use He and McGregor reference list for potential studies
- 2) Electronic search from 2005-2011

##### *a. PubMed*

01 January 2005 to 06 July 2011

(blood pressure[MeSH] OR hypertension[MeSH] OR blood pressure[tiab] OR hypertension[tiab]) AND (sodium[MeSH] OR salt[MeSH] OR sodium chloride[MeSH] OR sodium[tiab] OR salt[tiab] OR sodium chloride[tiab]) AND (diet[MeSH] OR dietary[MeSH] OR intake[MeSH] OR restriction[MeSH] OR reduction[MeSH] OR diet[tiab] OR

---

<sup>1</sup> [www.who.int/nutrition](http://www.who.int/nutrition)

dietary[tiab] OR intake[tiab] OR restriction[tiab] or reduction[tiab]) AND (randomized controlled trial [pt] OR controlled clinical trial [pt] OR randomized [tiab] OR placebo [tiab] OR drug therapy [sh] OR randomly [tiab] OR trial [tiab] OR groups [tiab]) NOT (animals [mh] NOT humans [mh])

*b. EMBASE*

01 January 2005 to 02 August 2011

(1) sodium/blood pressure in adults

Step 1

'sodium chloride'/exp OR 'sodium'/exp OR salt:ti,ab OR sodium:ti,ab

Step 2

'diet'/exp OR 'electrolyte intake'/exp OR 'diet restriction'/exp or 'dietary':ti,ab OR 'diet':ti,ab OR intake:ti,ab OR restriction:ti,ab or restricted:ti,ab or restrictive:ti,ab or reduce:ti,ab or reduced;ti, ab OR reduction:ti,ab

Step 1 AND Step 2

Step 3

'randomized controlled trial'/exp OR 'controlled trial':ab,ti OR 'randomized':ab,ti AND 'randomised':ab,ti OR placebo:ab,ti OR 'drug therapy':ab,ti OR randomly:ab,ti OR trial:ab,ti OR groups:ab,ti

Step 4

(Step 1 AND Step 2 AND Step 3) AND [2005-2012]/py

Step 5

(Step 1 AND Step 2 ) AND [randomized controlled trial]/lim AND [2005-2012]/py

Step 6

(Step 4 OR Step 5) AND [animals]/lim

Step 7

(Step 4 OR Step 5) AND [animals]/lim AND [humans]/lim

Step 8

(Step 4 OR Step 5) NOT Step 6

Step 9

Step 8 OR Step 7

*c. LILACS*

No date limit run on 06 August 2011

(blood pressure OR hypertension) AND (sodium OR salt) AND (diet OR dietary OR intake OR restriction or reduction) AND (randomized controlled trial OR controlled clinical trial OR randomized OR placebo OR drug therapy OR randomly OR trial OR groups)

*d. Cochrane central register of controlled trials*

Limit by Dates 01 January 2005 to 24 August 2011

(blood pressure OR hypertension) AND (sodium OR salt) AND (diet OR dietary OR intake OR restriction or reduction) AND (randomized controlled trial OR controlled clinical trial OR randomized OR placebo OR drug therapy randomly OR trial OR groups)

*e. WHO International Clinical Trials Registry Platform (ICTRP)*

No date limit run on 23 August 2011

(blood pressure AND sodium) OR (blood pressure AND salt) OR (hypertension AND sodium) OR (hypertension AND salt)

### Blood Pressure (Children)

Identified systematic review of the literature published by the Dietary Guidelines for Americans Committee (DGAC) 2010

1) Use DGAC reference list for potential studies

2) Electronic search from 2009-2011

#### a. *PubMed*

01 January 2009 - 06 July 2011

("Hypertension"[Majr] OR "blood pressure"[Majr]) AND ("Sodium, Dietary"[Mesh] OR ("sodium, dietary"[MeSH Terms] OR "sodium"[MeSH Terms]) OR "sodium chloride"[mesh]) AND "humans"[Filter]

all child 0-18 yrs, January 1, 2009 to July 6, 2011

#### b. *EMBASE*

01 January 2009 - 02 August 2011

2) Blood Pressure (Children)

Step 1

'hypertension'/exp/mj OR 'blood pressure'/exp/mj

Step 2

'child'/exp OR 'children'/exp OR 'youth'/exp OR youth\* OR newborn\* OR 'newborn'/exp OR 'new born' OR 'childhood disease'/exp OR 'baby'/exp OR babies OR 'infant'/exp OR infant\* OR childhood\* OR toddler\* OR kid OR kids OR 'young patient' OR boy\* OR girl\* OR 'young age' OR pediater\* OR paediatric\* OR 'child death'/exp OR 'child health'/exp OR 'child care'/exp OR 'childhood mortality'/exp OR 'child hospitalization'/exp OR 'pediatric hospital'/exp OR child\* AND [2009-2012]/py

Step 3

(Step 1 AND Step 2) AND [animals]/lim

Step 4

(Step 1 AND Step 2) AND [animals]/lim AND [humans]/lim

Step 5

(Step 1 AND Step 2) NOT Step 3

Step 4 OR Step 5

#### c. *LILACS*

No date limit run on 06 August 2011

(blood pressure OR hypertension) AND (sodium OR salt) AND (diet OR dietary OR intake OR restriction or reduction)

*Limit Adolescent, Child, Preschool*

#### d. *WHO International Clinical Trials Registry Platform (ICTRP)*

No date limit run on 23 August 2011

(blood pressure AND sodium) OR (blood pressure AND salt) OR (hypertension AND sodium) OR (hypertension AND salt)

e. *Cochrane Central Register of Controlled Trials*

01 January 2005 - 24 August 2011

(blood pressure OR hypertension) AND (sodium OR salt) AND (diet OR dietary OR intake OR restriction or reduction) AND (randomized controlled trial OR controlled clinical trial OR randomized OR placebo OR drug therapy randomly OR trial OR groups)

Adverse Effects (Adults and Children)

1) No systematic reviews identified with similar or equivalent inclusion criteria.

2) Run electronic search for RCTs

a. *PubMed*

No date limit run 06 July 2011

(salt[MeSH] OR sodium[MeSH] OR salt[tiab] OR sodium[tiab]) AND (noradrenaline[MeSH] OR norepinephrine[MeSH] OR noradrenaline[tiab] OR norepinephrine[tiab] OR catecholamine[MeSH] OR catecholamine[tiab] OR cholesterol[MeSH] OR triglycerides[MeSH] OR low density lipoprotein[MeSH] OR high density lipoprotein[MeSH] OR LDL[tiab] OR HDL[tiab] OR cholesterol[tiab] OR triglyceride[tiab]) AND (randomized controlled trial [pt] OR controlled clinical trial [pt] OR randomized [tiab] OR placebo [tiab] OR drug therapy [sh] OR randomly [tiab] OR trial [tiab] OR groups [tiab]) NOT (animals [mh] NOT humans [mh])

b. *EMBASE*

No date limit run 02 August 2011

3) Adverse Effects (Adults and Children)

Step 1

'sodium chloride'/exp OR 'sodium'/exp OR salt:ti,ab OR sodium:ti,ab

Step 2

'noradrenalin'/exp OR 'adrenor':ab,ti OR 'alginodia':ab,ti OR 'arterenal':ab,ti OR 'arterenol':ab,ti OR 'baycain green':ab,ti OR 'd noradrenalin':ab,ti OR 'dextro noradrenalin':ab,ti OR 'dextro noradrenaline':ab,ti OR 'dl arterenol':ab,ti OR 'dl noradrenalin':ab,ti OR 'dl noradrenalin hydrochloride':ab,ti OR 'l alpha aminomethyl 3, 4 dihydroxybenzyl alcohol':ab,ti OR 'l noradrenalin':ab,ti OR 'l noradrenalin hydrochloride':ab,ti OR 'l noradrenaline':ab,ti OR 'l norepinephrine':ab,ti OR 'levarterenol':ab,ti OR 'levo noradrenalin':ab,ti OR 'levo noradrenaline':ab,ti OR 'levo norepinephrine':ab,ti OR 'levonor':ab,ti OR 'levophed':ab,ti OR 'neomelubrin':ab,ti OR 'neurogenic noradrenalin':ab,ti OR 'noradrec':ab,ti OR 'noradrenalin hydrochloride':ab,ti OR 'noradrenalin reduction':ab,ti OR 'noradrenaline':ab,ti OR 'noradrine':ab,ti OR 'norepinephrin':ab,ti OR 'norepinephrine':ab,ti OR 'norepinephrine hydrochloride':ab,ti OR 'norexadrin':ab,ti OR 'revarterenol':ab,ti OR 'sympathin':ab,ti OR 'sympathin e':ab,ti OR 'catecholamine'/exp OR 'catechol amine; catecholamin':ab,ti OR 'catecholamines':ab,ti OR 'cathecholamine':ab,ti OR 'dextro pyrocatecholamine':ab,ti OR 'endogenous catecholamine':ab,ti OR 'pyrocatechinamine':ab,ti OR 'pyrocatecholamine':ab,ti OR 'hydroxy 5 cholestene':ab,ti OR '3beta hydroxy 5 cholestene':ab,ti OR '3beta hydroxycholest 5 ene':ab,ti OR '5 cholesten 3beta ol':ab,ti OR 'beta cholesterol':ab,ti OR 'cholest 5 en 3beta ol':ab,ti OR 'cholest 5 ene 3 ol':ab,ti OR 'cholesterin':ab,ti OR 'cholesterine':ab,ti OR 'cholesterol release':ab,ti OR

'dythol':ab,ti OR 'nsc 8798':ab,ti OR 'cholesterol'/exp OR 'riacylglycerol' OR 'acylglycerol, tri':ab,ti OR 'fatty acid triglyceride':ab,ti OR 'triacyl glyceride':ab,ti OR 'triglyceride':ab,ti OR 'triglycerides':ab,ti OR 'tryglyceride':ab,ti OR 'beta lipoprotein':ab,ti OR 'ldl':ab,ti OR 'lipoprotein, beta':ab,ti OR 'lipoprotein, low density':ab,ti OR 'lipoproteins, ldl' OR 'low density lipoprotein'/exp OR 'lpha 7 lipoprotein':ab,ti OR 'alpha lipoprotein':ab,ti OR 'hdl':ab,ti OR 'high density lipoprotein phospholipid':ab,ti OR 'lipoprotein, alpha':ab,ti OR 'lipoprotein, high density':ab,ti OR 'lipoproteins, hdl':ab,ti OR 'pre alpha lipoprotein':ab,ti OR 'very high density lipoprotein' OR 'high density lipoprotein'/exp AND ([cochrane review]/lim OR [controlled clinical trial]/lim OR [meta analysis]/lim OR [randomized controlled trial]/lim OR [systematic review]/lim)

### Step 3

('noradrenalin'/exp OR 'adrenor':ab,ti OR 'alginodia':ab,ti OR 'arterenal':ab,ti OR 'arterenol':ab,ti OR 'baycain green':ab,ti OR 'd noradrenalin':ab,ti OR 'dextro noradrenalin':ab,ti OR 'dextro noradrenaline':ab,ti OR 'dl arterenol':ab,ti OR 'dl noradrenalin':ab,ti OR 'dl noradrenalin hydrochloride':ab,ti OR 'l alpha aminomethyl 3, 4 dihydroxybenzyl alcohol':ab,ti OR 'l noradrenalin':ab,ti OR 'l noradrenalin hydrochloride':ab,ti OR 'l noradrenaline':ab,ti OR 'l norepinephrine':ab,ti OR 'levarterenol':ab,ti OR 'levo noradrenalin':ab,ti OR 'levo noradrenaline':ab,ti OR 'levo norepinephrine':ab,ti OR 'levonor':ab,ti OR 'levophed':ab,ti OR 'neomelubrin':ab,ti OR 'neurogenic noradrenalin':ab,ti OR 'noradrec':ab,ti OR 'noradrenalin hydrochloride':ab,ti OR 'noradrenalin reduction':ab,ti OR 'noradrenaline':ab,ti OR 'noradrine':ab,ti OR 'norepinephrin':ab,ti OR 'norepinephrine':ab,ti OR 'norepinephrine hydrochloride':ab,ti OR 'norexadrin':ab,ti OR 'revarterenol':ab,ti OR 'sympathin':ab,ti OR 'sympathin e':ab,ti OR 'catecholamine'/exp OR 'catechol amine; catecholamin':ab,ti OR 'catecholamines':ab,ti OR 'cathecholamine':ab,ti OR 'dextro pyrocatecholamine':ab,ti OR 'endogenous catecholamine':ab,ti OR 'pyrocatechinamine':ab,ti OR 'pyrocatecholamine':ab,ti OR 'hydroxy 5 cholestene':ab,ti OR '3beta hydroxy 5 cholestene':ab,ti OR '3beta hydroxycholest 5 ene':ab,ti OR '5 cholesten 3beta ol':ab,ti OR 'beta cholesterol':ab,ti OR 'cholest 5 en 3beta ol':ab,ti OR 'cholest 5 ene 3 ol':ab,ti OR 'cholesterin':ab,ti OR 'cholesterine':ab,ti OR 'cholesterol release':ab,ti OR 'dythol':ab,ti OR 'nsc 8798':ab,ti OR 'cholesterol'/exp OR 'riacylglycerol' OR 'acylglycerol, tri':ab,ti OR 'fatty acid triglyceride':ab,ti OR 'triacyl glyceride':ab,ti OR 'triglyceride':ab,ti OR 'triglycerides':ab,ti OR 'tryglyceride':ab,ti OR 'beta lipoprotein':ab,ti OR 'ldl':ab,ti OR 'lipoprotein, beta':ab,ti OR 'lipoprotein, low density':ab,ti OR 'lipoproteins, ldl' OR 'low density lipoprotein'/exp OR 'lpha 7 lipoprotein':ab,ti OR 'alpha lipoprotein':ab,ti OR 'hdl':ab,ti OR 'high density lipoprotein phospholipid':ab,ti OR 'lipoprotein, alpha':ab,ti OR 'lipoprotein, high density':ab,ti OR 'lipoproteins, hdl':ab,ti OR 'pre alpha lipoprotein':ab,ti OR 'very high density lipoprotein' OR 'high density lipoprotein'/exp) AND ('randomized controlled trial'/exp OR 'controlled trial':ab,ti OR 'randomized':ab,ti OR 'randomised':ab,ti OR placebo:ab,ti OR 'drug therapy':ab,ti OR randomly:ab,ti OR trial:ab,ti OR groups:ab,ti)

### Step 4

'low density lipoprotein'/exp/dd\_dt OR 'cholesterol'/exp/dd\_dt OR 'noradrenalin'/exp/dd\_dt OR 'high density lipoprotein'/exp/dd\_dt

Step 5  
Step 1 AND (Step 2 OR Step 3 OR Step 4)

Step 6  
Step 5 AND [animals]/lim

Step 7  
Step 5 AND [animals]/lim AND [humans]/lim

Step 8  
Step 5 NOT Step 6

Step 9  
Step 7 OR Step 8

c. *LILACS*

No date limit run on 06 August 2011  
(salt OR sodium) AND (noradrenaline OR norepinephrine OR catecholamine OR cholesterol OR triglycerides OR low density lipoprotein OR high density lipoprotein OR LDL OR HDL)

*Limit Human*

d. *WHO International Clinical Trials Registry Platform (ICTRP)*

No date limit run on 23 August 2011  
salt AND noradrenaline OR salt AND norepinephrine OR salt AND catecholamine OR salt AND cholesterol OR salt AND triglycerides OR salt AND low density lipoprotein OR salt AND high density lipoprotein OR salt AND LDL OR salt AND HDL OR sodium AND noradrenaline OR sodium AND norepinephrine OR sodium AND catecholamine OR sodium AND cholesterol OR sodium AND triglycerides OR sodium AND low density lipoprotein OR sodium AND high density lipoprotein OR sodium AND LDL OR sodium AND HDL

e. *Cochrane Central Register of Controlled Trials*

No dates limit run on 24 August 2011  
(salt OR sodium) AND (noradrenaline OR norepinephrine OR catecholamine OR cholesterol OR triglycerides OR low density lipoprotein OR high density lipoprotein OR LDL OR HDL) AND (randomized controlled trial OR controlled clinical trial OR randomized OR placebo OR drug therapy OR randomly OR trial OR groups)

Renal Function (Adults)

1) No systematic reviews identified with similar or equivalent inclusion criteria.

2) Run electronic search for RCTs

a. *EMBASE*

No date limit run on 02 August 2011

4) Renal Function (Adults)

Step 1

'sodium chloride'/exp OR 'sodium'/exp OR salt:ti,ab OR sodium:ti,ab

## Step 2

('kidney diseases':ab,ti OR 'kidney disorder':ab,ti OR 'kidney pathology':ab,ti OR 'nephropathy':ab,ti OR 'perinephritis':ab,ti OR 'perirenal infection':ab,ti OR 'renal disease':ab,ti OR 'renal disorder':ab,ti OR 'unilateral kidney disease':ab,ti OR 'kidney disease'/exp OR renal:ab,ti OR analgesic AND nephropathy:ab,ti OR 'chronic kidney disease':ab,ti OR 'cystinuria':ab,ti OR 'diabetic nephropathy':ab,ti OR 'fabry disease':ab,ti OR 'gitelman syndrome':ab,ti OR 'glomerulopathy':ab,ti OR 'gordon syndrome':ab,ti OR 'hepatorenal syndrome':ab,ti OR 'hiv associated nephropathy':ab,ti OR 'immunoglobulin a nephropathy':ab,ti OR 'kidney amyloidosis':ab,ti OR 'kidney calcification':ab,ti OR 'kidney colic':ab,ti OR 'kidney cyst':ab,ti OR 'kidney dysfunction':ab,ti OR 'kidney failure':ab,ti OR 'kidney fibrosis':ab,ti OR 'kidney hemorrhage':ab,ti OR 'kidney hypertrophy':ab,ti OR 'kidney infarction':ab,ti OR 'kidney infection':ab,ti OR 'kidney injury':ab,ti OR 'kidney ischemia':ab,ti OR 'kidney malformation':ab,ti OR 'kidney necrosis':ab,ti OR 'kidney pain':ab,ti OR 'kidney papilla necrosis':ab,ti OR 'kidney polycystic disease':ab,ti OR 'kidney rupture':ab,ti OR 'kidney scar':ab,ti OR 'kidney tubule acidosis':ab,ti OR 'kidney tubule damage':ab,ti OR 'kidney tubule disorder':ab,ti OR 'kidney tumor':ab,ti OR 'liddle syndrome':ab,ti OR 'lowe syndrome':ab,ti OR 'meckel syndrome':ab,ti OR 'medullary sponge kidney':ab,ti OR 'nephritis':ab,ti OR 'nephrogenic diabetes insipidus':ab,ti OR 'nephrolithiasis':ab,ti OR 'nephronophthisis':ab,ti OR 'nephrosis':ab,ti OR 'nephrotoxicity':ab,ti OR 'perirenal abscess':ab,ti OR 'prune belly syndrome':ab,ti OR 'pyelectasis':ab,ti OR 'reflux nephropathy':ab,ti OR 'renal diabetes':ab,ti OR 'renal graft dysfunction':ab,ti OR 'renovascular disease':ab,ti OR 'silent kidney':ab,ti OR 'uric acid nephropathy':ab,ti OR 'kidney disease'/exp) AND ([cochrane review]/lim OR [controlled clinical trial]/lim OR [meta analysis]/lim OR [randomized controlled trial]/lim OR [systematic review]/lim)

## Step 3

('kidney diseases':ab,ti OR 'kidney disorder':ab,ti OR 'kidney pathology':ab,ti OR 'nephropathy':ab,ti OR 'perinephritis':ab,ti OR 'perirenal infection':ab,ti OR 'renal disease':ab,ti OR 'renal disorder':ab,ti OR 'unilateral kidney disease':ab,ti OR 'kidney disease'/exp OR renal:ab,ti OR analgesic AND nephropathy:ab,ti OR 'chronic kidney disease':ab,ti OR 'cystinuria':ab,ti OR 'diabetic nephropathy':ab,ti OR 'fabry disease':ab,ti OR 'gitelman syndrome':ab,ti OR 'glomerulopathy':ab,ti OR 'gordon syndrome':ab,ti OR 'hepatorenal syndrome':ab,ti OR 'hiv associated nephropathy':ab,ti OR 'immunoglobulin a nephropathy':ab,ti OR 'kidney amyloidosis':ab,ti OR 'kidney calcification':ab,ti OR 'kidney colic':ab,ti OR 'kidney cyst':ab,ti OR 'kidney dysfunction':ab,ti OR 'kidney failure':ab,ti OR 'kidney fibrosis':ab,ti OR 'kidney hemorrhage':ab,ti OR 'kidney hypertrophy':ab,ti OR 'kidney infarction':ab,ti OR 'kidney infection':ab,ti OR 'kidney injury':ab,ti OR 'kidney ischemia':ab,ti OR 'kidney malformation':ab,ti OR 'kidney necrosis':ab,ti OR 'kidney pain':ab,ti OR 'kidney papilla necrosis':ab,ti OR 'kidney polycystic disease':ab,ti OR 'kidney rupture':ab,ti OR 'kidney scar':ab,ti OR 'kidney tubule acidosis':ab,ti OR 'kidney tubule damage':ab,ti OR 'kidney tubule disorder':ab,ti OR 'kidney tumor':ab,ti OR 'liddle syndrome':ab,ti OR 'lowe syndrome':ab,ti OR 'meckel syndrome':ab,ti OR 'medullary sponge kidney':ab,ti OR 'nephritis':ab,ti OR 'nephrogenic diabetes insipidus':ab,ti OR 'nephrolithiasis':ab,ti OR



'nephronophthisis':ab,ti OR 'nephrosis':ab,ti OR 'nephrotoxicity':ab,ti OR 'perirenal abscess':ab,ti OR 'prune belly syndrome':ab,ti OR 'pyelectasis':ab,ti OR 'reflux nephropathy':ab,ti OR 'renal diabetes':ab,ti OR 'renal graft dysfunction':ab,ti OR 'renovascular disease':ab,ti OR 'silent kidney':ab,ti OR 'uric acid nephropathy':ab,ti OR 'kidney disease'/exp) AND ('randomized controlled trial'/exp OR 'controlled trial':ab,ti OR 'randomized':ab,ti OR 'randomised':ab,ti OR placebo:ab,ti OR 'drug therapy':ab,ti OR randomly:ab,ti OR trial:ab,ti OR groups:ab,ti)

Step 4

'kidney disease'/exp/dm\_dt

Step 5

Step 1 AND (Step 2 OR Step 3 OR Step 4)

Step 6

Step 5 AND [animals]/lim

Step 7

Step 5 AND [animals]/lim AND [humans]/lim

Step 8

Step 5 NOT Step 6

Step 9

Step 7 OR Step 8

b. *LILACS*

No date limit run on 06 August 2011

(salt OR sodium) AND (renal disease OR renal) AND (dietary OR diet OR diets OR restriction OR reduction OR reduce OR restrict)

*Limit Human*

c. *PubMed*

01 March 2011 to 23 August 2011

(salt[MeSH] OR sodium[MeSH] OR salt[tiab] OR sodium[tiab]) AND (renal disease[MeSH] OR renal[tiab]) AND (dietary[MeSH] OR diet[MeSH] OR diets[MeSH] OR restriction[MeSH] OR reduction[MeSH] OR reduce[MeSH] OR restrict[MeSH]) AND (randomized controlled trial [pt] OR controlled clinical trial [pt] OR randomized [tiab] OR placebo [tiab] OR drug therapy [sh] OR randomly [tiab] OR trial [tiab] OR groups [tiab]) NOT (animals [mh] NOT humans [mh])

d. *WHO International Clinical Trials Registry Platform (ICTRP)*

No date limit run on 23 August 2011

(salt AND renal disease) OR (sodium AND renal disease)

e. *Cochrane Central Register of Controlled Trials*

No dates limit run on 24 August 2011

(salt OR sodium) AND (renal disease OR renal) AND (dietary OR diet OR diets OR restriction OR reduction OR reduce OR restrict)

## **B. Search for studies reporting all-cause mortality, cardiovascular disease, stroke, or coronary heart disease.**

### **B.1. Search for systematic reviews and meta-analyses**

We searched the PubMed database and The Cochrane Library in August 2011 for systematic reviews on sodium intake and CVD, stroke and CHD. We considered systematic reviews of RCTs and cohort studies. We also contacted authors of the systematic reviews to consult about any other published systematic reviews.

#### **Electronic searches**

Because recent, high-quality systematic reviews were found, we did not conduct a separate electronic search for studies on the effect of increased sodium on CVD morbidity and mortality.

#### **Other resources**

We searched for further trials on the WHO web site<sup>2</sup> and in the reference lists of identified papers. For assistance in identifying ongoing or unpublished studies, we contacted the WHO Department of Nutrition for Health and Development and other international partners, such as academic and research institutions with a known interest in this field. We also contacted the authors of the systematic reviews on this topic to identify any potentially relevant studies in the recent literature.

---

<sup>2</sup> [www.who.int/nutrition](http://www.who.int/nutrition)

## OSM 2: Study Characteristics

### A. Adult RCTs included in the systematic review reporting blood pressure, renal function, blood lipids, or catecholamine levels

ANDERSSON 1984

|                      |                                                                                                                                                                                                                                                                                                                                                                                                                      |
|----------------------|----------------------------------------------------------------------------------------------------------------------------------------------------------------------------------------------------------------------------------------------------------------------------------------------------------------------------------------------------------------------------------------------------------------------|
| <b>Methods</b>       | <b>Parallel study design</b> of reduced sodium, fat and carbohydrate diet and participants randomized to sodium tablets or not. Conducted in Sweden.                                                                                                                                                                                                                                                                 |
| <b>Participants</b>  | 23 hypertensive adults not taking medical therapy to control blood pressure and all 20-40% overweight.                                                                                                                                                                                                                                                                                                               |
| <b>Interventions</b> | Group1 -- reduced sodium, fat and CHO diet plus sodium tablets (control)<br>Group2 -- reduced sodium, fat and CHO diet (reduced sodium)                                                                                                                                                                                                                                                                              |
| <b>Outcomes</b>      | Resting blood pressure<br>LV hypertrophy<br>Hemodynamic indicators<br>Urinary noradrenaline<br>Plasma noradrenaline<br>Cardiac output<br>Mean arterial pressure (MAP)                                                                                                                                                                                                                                                |
| <b>Notes</b>         | 1) Sodium reduction achieved - <b>&gt;1/3 of control</b><br>- <b>&gt;2g/d in intervention</b><br>- <b>&gt; 1.2 g/d in intervention</b><br>2) Age- <b>Adult (15 yrs or greater)</b><br>3) Group - <b>hypertensive</b><br>4) Duration of follow-up (in months) – <b>2.5 months (9-11 weeks)</b><br>5) Sex - <b>male</b><br>6) Blood pressure method - <b>manual</b><br>7) Blood pressure method - <b>supine office</b> |

Risk of bias table

| <b>Bias</b>                                               | <b>Authors' judgement</b> | <b>Support for judgement</b>                          |
|-----------------------------------------------------------|---------------------------|-------------------------------------------------------|
| Random sequence generation (selection bias)               | Unclear risk              | No description of method of sequence generation       |
| Allocation concealment (selection bias)                   | Unclear risk              | No description of method of concealment of allocation |
| Blinding of participants and personnel (performance bias) | High risk                 | Providers and participants were not blinded.          |
| Blinding of outcome assessment (detection bias)           | Unclear risk              | Unclear if outcome assessor was blinded.              |
| Incomplete outcome data (attrition bias)                  | Low risk                  | < 5% loss-to-follow-up                                |
| Selective reporting (reporting bias)                      | Low risk                  | All outcomes reported                                 |

|                      |                                                                                                                                                                                                                                                                                                                                                                                                                          |
|----------------------|--------------------------------------------------------------------------------------------------------------------------------------------------------------------------------------------------------------------------------------------------------------------------------------------------------------------------------------------------------------------------------------------------------------------------|
| <b>Methods</b>       | <b>Parallel design study</b> followed by a <b>cross-over design</b> study of reduced sodium diet and randomized to receive sodium tablets or placebo tablets. Conducted in Australia                                                                                                                                                                                                                                     |
| <b>Participants</b>  | 111 men and women with DBP 90- 100 not taking medical therapy to control blood pressure.                                                                                                                                                                                                                                                                                                                                 |
| <b>Interventions</b> | Group1 -- reduced sodium in diet through counselling plus 80mmol sodium per day in sodium chloride tablets and thus no change in sodium intake (control)<br>Group2 -- reduced sodium in diet through counselling plus placebo tablets and thus reduced sodium intake (achieved 90mmol/day average)                                                                                                                       |
| <b>Outcomes</b>      | Resting blood pressure<br>Plasma cholesterol<br>Urinary creatinine excretion                                                                                                                                                                                                                                                                                                                                             |
| <b>Notes</b>         | 1) Sodium reduction achieved - <b>&gt;1/3 of control</b><br>- <b>&gt;2g/d in intervention</b><br>- <b>&gt; 1.2 g/d in intervention</b><br>2) Age- <b>Adult (15 yrs or greater)</b><br>3) Group - <b>hypertensive</b><br>4) Duration of follow-up (in months) - <b>2 months</b><br>5) Sex - <b>both (heterogeneous)</b><br>6) Blood pressure method - <b>automatic</b><br>7) Blood pressure method - <b>seated office</b> |

Risk of bias table

| <b>Bias</b>                                               | <b>Authors' judgement</b> | <b>Support for judgement</b>                                                                                                       |
|-----------------------------------------------------------|---------------------------|------------------------------------------------------------------------------------------------------------------------------------|
| Random sequence generation (selection bias)               | Unclear risk              | No description of method of sequence generation                                                                                    |
| Allocation concealment (selection bias)                   | Unclear risk              | No description of method of concealment of allocation                                                                              |
| Blinding of participants and personnel (performance bias) | Unclear risk              | Providers were blinded but the blinding of subjects was unclear and unlikely                                                       |
| Blinding of outcome assessment (detection bias)           | Unclear risk              | Unclear if outcome assessors were blinded                                                                                          |
| Incomplete outcome data (attrition bias)                  | Low risk                  | Parallel study had low loss to follow-up, however, the cross-over study had high loss-to-follow up                                 |
| Selective reporting (reporting bias)                      | Low risk                  | Results stated that plasma cholesterol and GGT did not change from baseline to follow-up between groups but change not quantified. |

BENETOS 1992

|                      |                                                                                                                                                                                                                                                                                                                                                                                                                            |
|----------------------|----------------------------------------------------------------------------------------------------------------------------------------------------------------------------------------------------------------------------------------------------------------------------------------------------------------------------------------------------------------------------------------------------------------------------|
| <b>Methods</b>       | <b>Cross-over design</b> study of reduced sodium diet and participants randomized to receive sodium tablets or placebo tablets. Conducted in France                                                                                                                                                                                                                                                                        |
| <b>Participants</b>  | 20 mild to moderate hypertensive adults not taking medical therapy to control blood pressure                                                                                                                                                                                                                                                                                                                               |
| <b>Interventions</b> | Group1 -- reduced sodium diet plus 60 mmol sodium in tablets / day (control)<br>Group2 -- reduced sodium diet plus lactose (placebo) tablets / day (reduced sodium)                                                                                                                                                                                                                                                        |
| <b>Outcomes</b>      | Resting blood pressure<br>Plasma adrenaline<br>Plasma noradrenaline<br>Plasma renin activity<br>Plasma aldosterone                                                                                                                                                                                                                                                                                                         |
| <b>Notes</b>         | 1) Sodium reduction achieved - <b>&gt;1/3 of control</b><br>- <b>&lt; 2g / d in intervention</b><br>- <b>&gt; 1.2 g/d in intervention</b><br>2) Age- <b>Adult (15 yrs or greater)</b><br>3) Group - <b>hypertensive</b><br>4) Duration of follow-up (in months) - <b>1 month</b><br>5) Sex - <b>both (heterogeneous)</b><br>6) Blood pressure method - <b>automatic</b><br>7) Blood pressure method - <b>supine office</b> |

Risk of bias table

| <b>Bias</b>                                               | <b>Authors' judgement</b> | <b>Support for judgement</b>                          |
|-----------------------------------------------------------|---------------------------|-------------------------------------------------------|
| Random sequence generation (selection bias)               | Unclear risk              | No description of method of sequence generation       |
| Allocation concealment (selection bias)                   | Unclear risk              | No description of method of concealment of allocation |
| Blinding of participants and personnel (performance bias) | Low risk                  | Participants and providers were blinded               |
| Blinding of outcome assessment (detection bias)           | Unclear risk              | Unclear if outcome assessors blinded                  |
| Incomplete outcome data (attrition bias)                  | Low risk                  | Loss to follow-up <10% (only 2 participants)          |
| Selective reporting (reporting bias)                      | Low risk                  | All outcomes reported.                                |

CAPPUCCIO 1997

|                      |                                                                                                                                                                                                                                                                                                                                                                                                                                                             |
|----------------------|-------------------------------------------------------------------------------------------------------------------------------------------------------------------------------------------------------------------------------------------------------------------------------------------------------------------------------------------------------------------------------------------------------------------------------------------------------------|
| <b>Methods</b>       | <b>Cross-over design</b> study of reduced sodium diet and participants randomized to receive sodium tablets or placebo tablets. Conducted in the UK.                                                                                                                                                                                                                                                                                                        |
| <b>Participants</b>  | 48 adults over the age of 60 who were either normotensive or hypertensives not taking medical therapy to control blood pressure                                                                                                                                                                                                                                                                                                                             |
| <b>Interventions</b> | Group1 -- reduced sodium diet plus 120mmol / day in sodium tablets (control)<br>Group2 -- reduced sodium diet plus placebo tablets (reduced sodium)                                                                                                                                                                                                                                                                                                         |
| <b>Outcomes</b>      | Resting blood pressure<br>Serum cholesterol<br>Serum triglyceride<br>Fasting glucose                                                                                                                                                                                                                                                                                                                                                                        |
| <b>Notes</b>         | 1) Sodium reduction achieved - <u>&gt;1/3 of control</u> / both<br>- <u>&gt;2g/d in intervention</u><br>- <u>&gt; 1.2 g/d in intervention</u><br>2) Age- <b>Adult (15 yrs or greater)</b><br>3) Group - <b>both</b><br>4) Duration of follow-up (in months) - <b>1 month (4 weeks)</b><br>5) Sex - <b>both (heterogeneous)</b><br>6) Blood pressure method - <b>automatic</b><br>7) Blood pressure method - <b>supine office</b> and <b>standing office</b> |

Risk of bias table

| <b>Bias</b>                                               | <b>Authors' judgement</b> | <b>Support for judgement</b>                                                       |
|-----------------------------------------------------------|---------------------------|------------------------------------------------------------------------------------|
| Random sequence generation (selection bias)               | Low risk                  | Random-generated numbers handled by author not involved in the clinical assessment |
| Allocation concealment (selection bias)                   | Low risk                  | Handled by someone not involved in the clinical assessment                         |
| Blinding of participants and personnel (performance bias) | Low risk                  | Participants and providers were blinded                                            |
| Blinding of outcome assessment (detection bias)           | Unclear risk              | Unclear if outcome assessors were blinded.                                         |
| Incomplete outcome data (attrition bias)                  | Low risk                  | Loss to follow-up reported at 2% (only 1 participant)                              |
| Selective reporting (reporting bias)                      | Low risk                  | All outcomes reported                                                              |

CHALMERS 1986

|                      |                                                                                                                                                                                                                                                                                                                                                                                                                                                                                                                                                  |
|----------------------|--------------------------------------------------------------------------------------------------------------------------------------------------------------------------------------------------------------------------------------------------------------------------------------------------------------------------------------------------------------------------------------------------------------------------------------------------------------------------------------------------------------------------------------------------|
| <b>Methods</b>       | <b>Parallel study design</b> with participants randomized to control diet, high potassium diet, reduced sodium diet, and high potassium/reduced sodium diet. Conducted in Australia                                                                                                                                                                                                                                                                                                                                                              |
| <b>Participants</b>  | 212 hypertensive adults not receiving medical therapy to control blood pressure.                                                                                                                                                                                                                                                                                                                                                                                                                                                                 |
| <b>Interventions</b> | Group1 -- Control diet through counselling and education<br>Group2 -- High potassium diet through counselling and education<br>Group3 -- Reduced sodium diet through counselling and education<br>Group4 -- High potassium/reduced sodium diet through counselling and education                                                                                                                                                                                                                                                                 |
| <b>Outcomes</b>      | Resting blood pressure<br>Urinary electrolytes<br>Urinary creatinine excretion<br>Serum K<br>Serum creatinine<br>Serum cholesterol*<br>Serum gamma-glutamyl transferase*<br><b>* Stated that pre-diet cholesterol and GGT were similar between groups and did not change over course of study</b>                                                                                                                                                                                                                                                |
| <b>Notes</b>         | 1) Sodium reduction achieved - <b>&gt;1/3 of control</b><br>- <b>&lt; 2g / d in intervention</b><br>- <b>&gt; 1.2 g/d in intervention</b><br>2) Age- <b>Adult (15 yrs or greater)</b><br>3) Group - <b>hypertensive</b><br>4) Duration of follow-up (in months) – <b>3 months</b><br>5) Sex - <b>both (heterogeneous)</b><br>6) Blood pressure method - <b>automatic</b><br>7) Blood pressure method - <b>seated office</b><br>Second phase of study included provision of supplements to same participants but results not used in this review. |

Risk of bias table

| <b>Bias</b>                                               | <b>Authors' judgement</b> | <b>Support for judgement</b>                                                                                                                                                      |
|-----------------------------------------------------------|---------------------------|-----------------------------------------------------------------------------------------------------------------------------------------------------------------------------------|
| Random sequence generation (selection bias)               | Unclear risk              | No description of method of sequence generation                                                                                                                                   |
| Allocation concealment (selection bias)                   | Unclear risk              | No description of method of concealment of allocation                                                                                                                             |
| Blinding of participants and personnel (performance bias) | High risk                 | Participants and providers were not blinded                                                                                                                                       |
| Blinding of outcome assessment (detection bias)           | Unclear risk              | Unclear if outcome assessors were blinded                                                                                                                                         |
| Incomplete outcome data (attrition bias)                  | Low risk                  | Loss to follow-up 5.7%                                                                                                                                                            |
| Selective reporting (reporting bias)                      | Unclear risk              | Stated that pre-diet cholesterol and GGT were similar between groups and did not change over course of study but values not quantified. Results of serum creatinine not reported. |

COBIAC 1992

|                |                                                                                    |
|----------------|------------------------------------------------------------------------------------|
| <b>Methods</b> | <b>Parallel study design</b> of reduced sodium diet and participants randomized to |
|----------------|------------------------------------------------------------------------------------|

|                      |                                                                                                                                                                                                                                                                                                                                                                                                                    |
|----------------------|--------------------------------------------------------------------------------------------------------------------------------------------------------------------------------------------------------------------------------------------------------------------------------------------------------------------------------------------------------------------------------------------------------------------|
|                      | receive sodium tablets or placebo tablets in addition to either fish oil or sunflower oil. Conducted in Australia                                                                                                                                                                                                                                                                                                  |
| <b>Participants</b>  | 114 apparently healthy 60-80 year olds not being medically treated for hypertension                                                                                                                                                                                                                                                                                                                                |
| <b>Interventions</b> | Group1 -- reduced sodium diet plus fish oil and 80 mmol sodium / day (fish control)<br>Group2 -- reduced sodium diet plus fish oil and placebo (fish reduced sodium)<br>Group3 -- reduced sodium diet plus sunflower oil and 80 mmol Na / day (sun control)<br>Group4 -- reduced sodium diet plus sunflower oil and placebo (sun reduced sodium)                                                                   |
| <b>Outcomes</b>      | Resting blood pressure                                                                                                                                                                                                                                                                                                                                                                                             |
| <b>Notes</b>         | 1) Sodium reduction achieved - <u>&gt;1/3 of control</u><br>- <u>&lt; 2g / d in intervention</u><br>- <u>&gt; 1.2 g/d in intervention</u><br>2) Age- <b>Adult (15 yrs or greater)</b><br>3) Group - <b>both</b><br>4) Duration of follow-up (in months) - <b>1 month</b><br>5) Sex - <b>both (heterogeneous)</b><br>6) Blood pressure method - <b>automatic</b><br>7) Blood pressure method - <b>seated office</b> |

Risk of bias table

| <b>Bias</b>                                               | <b>Authors' judgement</b> | <b>Support for judgement</b>                                     |
|-----------------------------------------------------------|---------------------------|------------------------------------------------------------------|
| Random sequence generation (selection bias)               | Low risk                  | Computer generated randomization schedule                        |
| Allocation concealment (selection bias)                   | Low risk                  | Concealed by dispensing in masked, individually coded containers |
| Blinding of participants and personnel (performance bias) | Low risk                  | Participants and providers were blinded                          |
| Blinding of outcome assessment (detection bias)           | Low risk                  | Outcome assessors blinded                                        |
| Incomplete outcome data (attrition bias)                  | Unclear risk              | Loss to follow-up reported at 7% but not clear from which group  |
| Selective reporting (reporting bias)                      | Low risk                  | All stated outcomes reported                                     |



DASH 2001

|                      |                                                                                                                                                                                                                                                                                                                                                                                                                                                                                                                                                                       |
|----------------------|-----------------------------------------------------------------------------------------------------------------------------------------------------------------------------------------------------------------------------------------------------------------------------------------------------------------------------------------------------------------------------------------------------------------------------------------------------------------------------------------------------------------------------------------------------------------------|
| <b>Methods</b>       | <b>Cross-over design</b> , feeding study and participants randomly assigned to eat either a control diet typical of intake in the United States or the DASH diet. Within the assigned diet, participants ate foods with control (150 mmol Na/day target), low (100 mmol Na/day target), and very low (50 mmol Na/day target) levels of sodium. Conducted in the United States of America.                                                                                                                                                                             |
| <b>Participants</b>  | 412 hypertensive or non-hypertensive adults not taking medical therapy to control blood pressure.                                                                                                                                                                                                                                                                                                                                                                                                                                                                     |
| <b>Interventions</b> | Group 1 -- DASH diet with sodium target 150 mmol/day (DASH control)<br>Group 2 -- DASH diet with sodium target 100 mmol/day (DASH low Na)<br>Group 3 -- DASH diet with sodium target 50 mmol/day (DASH very low Na)<br>Group 4 -- Normal diet with sodium target 150 mmol/day (control)<br>Group 5 -- Normal diet with sodium target 100 mmol/day (low Na)<br>Group 6 -- Normal diet with sodium target 50 mmol/day (very low Na)                                                                                                                                     |
| <b>Outcomes</b>      | Resting blood pressure<br>Urinary urea nitrogen excretion<br>Urinary creatinine excretion<br>Serum total cholesterol<br>Serum LDL cholesterol<br>Serum HDL cholesterol<br>Serum total triglycerides<br>Serum total cholesterol:HDL ratio                                                                                                                                                                                                                                                                                                                              |
| <b>Notes</b>         | 1) Sodium reduction achieved<br>Reduced sodium<br>- <b>&lt;1/3 of control</b><br>- <b>&gt;2g/d in intervention</b><br>- <b>&gt;1.2 g/d in intervention</b><br>Very reduced sodium<br>- <b>&gt;1/3 of control</b><br>- <b>&lt;2g / d in intervention</b><br>- <b>&lt;1.2 g/d in intervention</b><br>2) Age- <b>Adult (15 yrs or greater)</b><br>3) Group - <b>both</b><br>4) Duration of follow-up (in months) - <b>1 month</b><br>5) Sex - <b>both (heterogeneous)</b><br>6) Blood pressure method - <b>manual</b><br>7) Blood pressure method - <b>seated office</b> |

Risk of bias table

| <b>Bias</b>                                               | <b>Authors' judgement</b> | <b>Support for judgement</b>                |
|-----------------------------------------------------------|---------------------------|---------------------------------------------|
| Random sequence generation (selection bias)               | Low risk                  | Computer generated                          |
| Allocation concealment (selection bias)                   | Low risk                  | Allocation occurred at central location     |
| Blinding of participants and personnel (performance bias) | High risk                 | Participants and providers were not blinded |
| Blinding of outcome assessment (detection bias)           | Low risk                  | Outcome assessors blinded                   |
| Incomplete outcome data (attrition bias)                  | Low risk                  | Loss to follow-up 5.3%                      |
| Selective reporting (reporting bias)                      | Low risk                  | All outcomes reported                       |

|                      |                                                                                                                                                                                                                                                                                                                                                                                                                                                                                                                                                                                                                                                                 |
|----------------------|-----------------------------------------------------------------------------------------------------------------------------------------------------------------------------------------------------------------------------------------------------------------------------------------------------------------------------------------------------------------------------------------------------------------------------------------------------------------------------------------------------------------------------------------------------------------------------------------------------------------------------------------------------------------|
| <b>Methods</b>       | <b>Parallel design study</b> where participants were randomized to a reduced sodium diet or a "usual-sodium" diet followed by a <b>cross-over design</b> study of reduced sodium diet where participants were randomized to receive sodium tablets or placebo tablets. Conducted in the United Kingdom.                                                                                                                                                                                                                                                                                                                                                         |
| <b>Participants</b>  | 34 hypertensive, diabetic adults some of whom were taking medication and some of whom were not.                                                                                                                                                                                                                                                                                                                                                                                                                                                                                                                                                                 |
| <b>Interventions</b> | <p><b>Parallel design phase</b><br/> Group1 - normal diet (control)<br/> Group2 - reduced sodium diet (reduced sodium)</p> <p><b>Cross-over design phase</b><br/> Group 3 - reduced sodium diet plus sodium tablets (80mmol/day) (control cross over)<br/> Group 4 - reduced sodium diet plus placebo tablets (reduced sodium cross over)</p>                                                                                                                                                                                                                                                                                                                   |
| <b>Outcomes</b>      | Resting blood pressure<br>Serum urea<br>Patients in whom normal BP was achieved                                                                                                                                                                                                                                                                                                                                                                                                                                                                                                                                                                                 |
| <b>Notes</b>         | 1) Sodium reduction achieved<br>Parallel Design phase           - <u>&lt;1/3 of control</u><br>- <u>&gt;2g/d in intervention</u><br>- <u>&gt; 1.2 g/d in intervention</u><br>Cross-over Design phase       - <u>&gt;1/3 of control</u><br>- <u>&gt;2g/d in intervention</u><br>- <u>&gt; 1.2 g/d in intervention</u><br>2) <u>Age- Adult (15 yrs or greater)</u><br>3) Group - <u>hypertensive</u><br>4) Duration of follow-up (in months) - <u>3 months (parallel) / 1 month(cross-over)</u><br>5) Sex - <u>both (heterogeneous)</u><br>6) Blood pressure method - <u>manual</u><br>7) Blood pressure method - <u>supine office</u> and <u>standing office</u> |

Risk of bias table

| <b>Bias</b>                                               | <b>Authors' judgement</b> | <b>Support for judgement</b>                                                  |
|-----------------------------------------------------------|---------------------------|-------------------------------------------------------------------------------|
| Random sequence generation (selection bias)               | Unclear risk              | No description of method of sequence generation                               |
| Allocation concealment (selection bias)                   | Unclear risk              | No description of method of concealment of allocation                         |
| Blinding of participants and personnel (performance bias) | High risk                 | Participants and providers were not blinded                                   |
| Blinding of outcome assessment (detection bias)           | Unclear risk              | Unclear if outcome assessors were blinded                                     |
| Incomplete outcome data (attrition bias)                  | Low risk                  | <5% loss to follow-up in the parallel phase but > 20% in the cross-over phase |
| Selective reporting (reporting bias)                      | Low risk                  | All outcomes reported                                                         |

|                      |                                                                                                                                                                                                                                                                                                                                                                                                                                                                                                                                                                                                                                                                                                                                                   |
|----------------------|---------------------------------------------------------------------------------------------------------------------------------------------------------------------------------------------------------------------------------------------------------------------------------------------------------------------------------------------------------------------------------------------------------------------------------------------------------------------------------------------------------------------------------------------------------------------------------------------------------------------------------------------------------------------------------------------------------------------------------------------------|
| <b>Methods</b>       | <b>Parallel study design</b> where participants were randomized to reduced sodium or usual sodium diet. Participants were also randomized to drug treatment group (beta-blocker, diuretic, or combination of beta-blocker and diuretic) and then cross-over to other drug treatments.                                                                                                                                                                                                                                                                                                                                                                                                                                                             |
| <b>Participants</b>  | 107 adult hypertensive (20-70 years) not suffering diabetes.                                                                                                                                                                                                                                                                                                                                                                                                                                                                                                                                                                                                                                                                                      |
| <b>Interventions</b> | <p><b>No medication</b></p> <p>Group1 -- normal sodium diet plus no drug therapy (control)</p> <p>Group2 -- reduced sodium diet plus no drug therapy (reduced sodium)</p> <p><b>Beta-blocker</b></p> <p>Group3 -- normal sodium diet plus beta-blocker (control-B)</p> <p>Group4 -- reduced sodium diet plus beta-blocker (reduced sodium-B)</p> <p><b>Diuretic</b></p> <p>Group5 -- normal sodium diet plus diuretic (control-D)</p> <p>Group6 -- reduced sodium diet plus diuretic (reduced sodium-D)</p> <p><b>Beta-blocker and diuretic</b></p> <p>Group5 -- normal sodium diet plus combination beta-blocker and diuretic (control-C)</p> <p>Group6 -- reduced sodium diet plus combination beta-blocker and diuretic (reduced sodium-C)</p> |
| <b>Outcomes</b>      | Resting blood pressure<br>Plasma glucose<br>Plasma creatinine<br>Plasma cholesterol<br>Plasma HDL<br>Plasma urate<br>Adverse effects                                                                                                                                                                                                                                                                                                                                                                                                                                                                                                                                                                                                              |
| <b>Notes</b>         | <p>1) Sodium reduction achieved - <b>&gt;1/3 of control</b><br/> - <b>&lt; 2g / d in intervention</b><br/> - <b>&gt; 1.2 g/d in intervention</b></p> <p>2) Age- <b>Adult (15 yrs or greater)</b></p> <p>3) Group - <b>hypertensive</b></p> <p>4) Duration of follow-up (in months) - <b>6 months (24 weeks)</b></p> <p>5) Sex - <b>both (heterogeneous)</b></p> <p>6) Blood pressure method - <b>manual</b></p> <p>7) Blood pressure method - <b>supine office</b> and <b>standing office</b></p>                                                                                                                                                                                                                                                 |

Risk of bias table

| <b>Bias</b>                                               | <b>Authors' judgement</b> | <b>Support for judgement</b>                                                             |
|-----------------------------------------------------------|---------------------------|------------------------------------------------------------------------------------------|
| Random sequence generation (selection bias)               | Unclear risk              | No description of method of sequence generation                                          |
| Allocation concealment (selection bias)                   | Unclear risk              | No description of method of concealment of allocation                                    |
| Blinding of participants and personnel (performance bias) | High risk                 | Participants and providers were not blinded                                              |
| Blinding of outcome assessment (detection bias)           | Low risk                  | Outcome assessors were blinded                                                           |
| Incomplete outcome data (attrition bias)                  | Unclear risk              | Loss to follow-up reported as 12% but not clear from which groups.                       |
| Selective reporting (reporting bias)                      | Unclear risk              | Reported no relative change in cholesterol, HDL and glucose without quantifying results. |



FOTHERBY 1993

|                      |                                                                                                                                                                                                                                                                                                                                                                                                                                                                                                                                                       |
|----------------------|-------------------------------------------------------------------------------------------------------------------------------------------------------------------------------------------------------------------------------------------------------------------------------------------------------------------------------------------------------------------------------------------------------------------------------------------------------------------------------------------------------------------------------------------------------|
| <b>Methods</b>       | <b>Crossover design study</b> of reduced sodium diet and participants randomized to receive sodium tablets or placebo tablets. Conducted in the United Kingdom.                                                                                                                                                                                                                                                                                                                                                                                       |
| <b>Participants</b>  | 18 hypertensive adults not taking medical therapy for the hypertension                                                                                                                                                                                                                                                                                                                                                                                                                                                                                |
| <b>Interventions</b> | Group1 - reduced sodium diet plus 80mmol/d of sodium tablets (control)<br>Group2 - reduced sodium diet plus equivalent placebo tablets (reduced sodium)                                                                                                                                                                                                                                                                                                                                                                                               |
| <b>Outcomes</b>      | Resting blood pressure<br>Ambulatory blood pressure<br>Ambulatory blood pressure<br>Urinary creatinine excretion<br>Urinary electrolytes<br>Urinary Na: creatinine ratio<br>Urinary K:creatinine ratio<br>Urine volume<br>Plasma aldosterone<br>Plasma Renin Activity<br>Heart rate<br>Serum cholesterol<br>Serum HDL<br>Serum LDL<br>Serum triglyceride<br>Urinary albumin excretion<br>Serum calcium<br>Serum creatinine<br>Serum urate<br>Serum Parathyroid hormone<br>Adverse effects                                                             |
| <b>Notes</b>         | 1) Sodium reduction achieved - <b>&gt;1/3 of control</b><br>- <b>&gt;2g/d in intervention</b><br>- <b>&gt; 1.2 g/d in intervention</b><br>2) Age- <b>Adult (15 yrs or greater)</b><br>3) Group - <b>hypertensive</b><br>4) Duration of follow-up (in months) - <b>1.25 months</b><br>5) Sex - <b>both (heterogeneous)</b><br>6) Blood pressure method - <b>automatic (ambulatory) / manual (office)</b><br>7) Blood pressure method - <b>supine office</b> and <b>standing office</b> and <b>ambulatory 24 hr / ambulatory day / ambulatory night</b> |

Risk of bias table

| <b>Bias</b>                                               | <b>Authors' judgement</b> | <b>Support for judgement</b>                          |
|-----------------------------------------------------------|---------------------------|-------------------------------------------------------|
| Random sequence generation (selection bias)               | Unclear risk              | No description of method of sequence generation       |
| Allocation concealment (selection bias)                   | Unclear risk              | No description of method of concealment of allocation |
| Blinding of participants and personnel (performance bias) | Low risk                  | Participants and providers were blinded               |
| Blinding of outcome assessment (detection bias)           | Unclear risk              | Unclear if outcome assessors were blinded             |
| Incomplete outcome data (attrition bias)                  | Low risk                  | 1 participant (5.6%) lost to follow-up                |
| Selective reporting (reporting bias)                      | Low risk                  | All outcomes reported.                                |

GATES 2004

|                      |                                                                                                                                                                                                                                                                                                                                                                                                                        |
|----------------------|------------------------------------------------------------------------------------------------------------------------------------------------------------------------------------------------------------------------------------------------------------------------------------------------------------------------------------------------------------------------------------------------------------------------|
| <b>Methods</b>       | <b>Crossover design study</b> of reduced sodium diet and participants randomized to receive sodium tablets or placebo tablets. Conducted in the United States of America.                                                                                                                                                                                                                                              |
| <b>Participants</b>  | 24 hypertensive adults over 50 years of age not taking medical therapy to control blood pressure.                                                                                                                                                                                                                                                                                                                      |
| <b>Interventions</b> | Group1 -- Reduced dietary intake of Na plus Na tablets prescribed to reach baseline Na intake values (control)<br>Group2 -- Reduced dietary intake of Na plus placebo (reduced sodium)                                                                                                                                                                                                                                 |
| <b>Outcomes</b>      | Resting blood pressure<br>Carotid artery compliance<br>Carotid artery stiffness<br>Adrenaline (assumed plasma)<br>Noradrenaline (assumed plasma)<br>Triglyceride (assumed plasma)<br>Cholesterol (assumed plasma)<br>HDL (assumed plasma)<br>LDL (assumed plasma)<br>VLDL (assumed plasma)<br>Serum glucose<br>Serum insulin                                                                                           |
| <b>Notes</b>         | 1) Sodium reduction achieved - <u>&gt;1/3 of control</u><br>- <u>&lt; 2g / d in intervention</u><br>- <u>&lt;1.2 g/d in intervention</u><br>2) Age- <b>Adult (15 yrs or greater)</b><br>3) Group - <b>hypertensive</b><br>4) Duration of follow-up (in months) - <b>1 month</b><br>5) Sex - <b>both (heterogeneous)</b><br>6) Blood pressure method - <b>manual</b><br>7) Blood pressure method - <b>supine office</b> |

Risk of bias table

| <b>Bias</b>                                               | <b>Authors' judgement</b> | <b>Support for judgement</b>                          |
|-----------------------------------------------------------|---------------------------|-------------------------------------------------------|
| Random sequence generation (selection bias)               | Unclear risk              | No description of method of sequence generation       |
| Allocation concealment (selection bias)                   | Unclear risk              | No description of method of concealment of allocation |
| Blinding of participants and personnel (performance bias) | Low risk                  | Participants and providers were blinded               |
| Blinding of outcome assessment (detection bias)           | Unclear risk              | Unclear if outcome assessor was blinded               |
| Incomplete outcome data (attrition bias)                  | Low risk                  | Loss to follow-up reported as 0%                      |
| Selective reporting (reporting bias)                      | Low risk                  | All outcomes reported                                 |

GELEIJNSE 1990

|                      |                                                                                                                                                                                                                                                                                                                                                |
|----------------------|------------------------------------------------------------------------------------------------------------------------------------------------------------------------------------------------------------------------------------------------------------------------------------------------------------------------------------------------|
| <b>Methods</b>       | <b>Cohort</b> study in children comparing tertiles of sodium intake over seven year follow-up and change in blood pressure during that time. Conducted in the Netherlands.                                                                                                                                                                     |
| <b>Participants</b>  | 233 children 5-17 years of age in final analysis                                                                                                                                                                                                                                                                                               |
| <b>Interventions</b> | No intervention                                                                                                                                                                                                                                                                                                                                |
| <b>Outcomes</b>      | Change in resting blood pressure over time                                                                                                                                                                                                                                                                                                     |
| <b>Notes</b>         | <p>1) <b>Not applicable</b></p> <p>2) Age- <b>children (1-14 yrs)</b></p> <p>3) Group - <b>not specified</b></p> <p>4) Duration of follow-up (in months) - <b>84 months (7 years)</b></p> <p>5) Sex - <b>both (heterogeneous)</b></p> <p>6) Blood pressure method - / <b>manual</b></p> <p>7) Blood pressure method - <b>seated office</b></p> |

Risk of bias table

| <b>Bias</b>                                               | <b>Authors' judgement</b> | <b>Support for judgement</b>                                                                    |
|-----------------------------------------------------------|---------------------------|-------------------------------------------------------------------------------------------------|
| Random sequence generation (selection bias)               | High risk                 | Not random                                                                                      |
| Selection of participants (selection bias)                | Low risk                  | Participants were randomly drawn from population survey                                         |
| Allocation concealment (selection bias)                   | Unclear risk              | Not applicable                                                                                  |
| Blinding of participants and personnel (performance bias) | Unclear risk              | Not applicable                                                                                  |
| Blinding of outcome assessment (detection bias)           | Low risk                  | Outcome assessors were blinded to tertile of sodium intake of participants                      |
| Incomplete outcome data (attrition bias)                  | High risk                 | The loss to follow-up was very high (>50%) and selection of final sample not explained clearly. |
| Selective reporting (reporting bias)                      | Low risk                  | All outcomes reported.                                                                          |
| Defining Exposure (confounding)                           | Low risk                  | Sodium intake was estimated from overnight urinary sodium excretion taken on multiple occasions |
| Other confounding                                         | Unclear risk              | No other potential confounders were controlled for                                              |

|                      |                                                                                                                                                                                                                                                                                                                                                                                                                            |
|----------------------|----------------------------------------------------------------------------------------------------------------------------------------------------------------------------------------------------------------------------------------------------------------------------------------------------------------------------------------------------------------------------------------------------------------------------|
| <b>Methods</b>       | <b>Cross-over study</b> design of reduced sodium diet with participants randomly assigned to sodium tablets or placebo tablets (or potassium tablets). Conducted in the Netherlands.                                                                                                                                                                                                                                       |
| <b>Participants</b>  | 40 hypertensive young adults (18-28 years) who may or may not have been medically treated for hypertension.                                                                                                                                                                                                                                                                                                                |
| <b>Interventions</b> | Group1 -- reduced sodium diet plus 90 mmol sodium / day tablets (control)<br>Group2 -- reduced sodium diet plus placebo tablets (reduced sodium)<br>Group3 -- reduced sodium diet plus potassium tablets (results not included in this review)                                                                                                                                                                             |
| <b>Outcomes</b>      | Resting blood pressure<br>Pulse rate<br>Cardiac output<br>Cardiac index<br>Urinary creatinine<br>Plasma noradrenaline<br>Plasma adrenaline<br>Plasma renin<br>Serum creatinine<br>Serum cholesterol<br>Serum uric acid                                                                                                                                                                                                     |
| <b>Notes</b>         | 1) Sodium reduction achieved - <b>&gt;1/3 of control</b><br>- <b>&lt; 2g / d in intervention</b><br>- <b>&gt; 1.2 g/d in intervention</b><br>2) Age- <b>Adult (15 yrs or greater)</b><br>3) Group - <b>hypertensive</b><br>4) Duration of follow-up (in months) – <b>1.5 months</b><br>5) Sex - <b>both (heterogeneous)</b><br>6) Blood pressure method - <b>manual</b><br>7) Blood pressure method - <b>supine office</b> |

Risk of bias table

| <b>Bias</b>                                               | <b>Authors' judgement</b> | <b>Support for judgement</b>                          |
|-----------------------------------------------------------|---------------------------|-------------------------------------------------------|
| Random sequence generation (selection bias)               | Unclear risk              | No description of method of sequence generation       |
| Allocation concealment (selection bias)                   | Unclear risk              | No description of method of concealment of allocation |
| Blinding of participants and personnel (performance bias) | Low risk                  | Participants and providers blinded                    |
| Blinding of outcome assessment (detection bias)           | Unclear risk              | Unclear if outcome assessors were blinded.            |
| Incomplete outcome data (attrition bias)                  | Low risk                  | Loss to follow-up reported as 0%                      |
| Selective reporting (reporting bias)                      | Low risk                  | All outcomes reported                                 |



|                      |                                                                                                                                                                                                                                                                                                                                                                                                                                                                                                                     |
|----------------------|---------------------------------------------------------------------------------------------------------------------------------------------------------------------------------------------------------------------------------------------------------------------------------------------------------------------------------------------------------------------------------------------------------------------------------------------------------------------------------------------------------------------|
| <b>Methods</b>       | <b>Cross-over study design</b> of reduced sodium diet and participants randomized to sodium tablets or placebo tablets. Conducted in the United Kingdom.                                                                                                                                                                                                                                                                                                                                                            |
| <b>Participants</b>  | 185 hypertensive adults with no history of medical treatment for elevated blood pressure.                                                                                                                                                                                                                                                                                                                                                                                                                           |
| <b>Interventions</b> | Group1 -- reduced sodium diet plus 90mmol sodium in tablets / day (control)<br>Group2 -- reduced sodium diet plus placebo tablets (reduced sodium)                                                                                                                                                                                                                                                                                                                                                                  |
| <b>Outcomes</b>      | Resting blood pressure<br>Ambulatory blood pressure<br>Pulse rate<br>Pulse wave velocity<br>Plasma renin activity<br>Plase creatinine<br>Plasma Aldosterone<br>Urinary creatinine excretion<br>Urinary calcium excretion<br>Urinary albumin excretion                                                                                                                                                                                                                                                               |
| <b>Notes</b>         | 1) Sodium reduction achieved - <b>&gt;1/3 of control</b><br>- <b>&gt;2g/d in intervention</b><br>- <b>&gt; 1.2 g/d in intervention</b><br>2) Age- <b>Adult (15 yrs or greater)</b><br>3) Group - <b>hypertensive</b><br>4) Duration of follow-up (in months) - <b>1.5 months</b><br>5) Sex - <b>both (heterogeneous)</b><br>6) Blood pressure method - <b>automatic (resting and ambulatory)</b><br>7) Blood pressure method - <b>seated office</b> and <b>ambulatory 24 hr / ambulatory day / ambulatory night</b> |

Risk of bias table

| <b>Bias</b>                                               | <b>Authors' judgement</b> | <b>Support for judgement</b>                                    |
|-----------------------------------------------------------|---------------------------|-----------------------------------------------------------------|
| Random sequence generation (selection bias)               | Low risk                  | Computer generated random number conducted by external company. |
| Allocation concealment (selection bias)                   | Low risk                  | External company conducted allocation of treatment or placebo   |
| Blinding of participants and personnel (performance bias) | Low risk                  | Participants and providers blinded                              |
| Blinding of outcome assessment (detection bias)           | Low risk                  | Outcome assessor blinded                                        |
| Incomplete outcome data (attrition bias)                  | Low risk                  | < 10% loss to follow-up                                         |
| Selective reporting (reporting bias)                      | Low risk                  | All outcomes reported                                           |

HOWE 1994

|                      |                                                                                                                                                                                                                                                                                                                                                                                                                               |
|----------------------|-------------------------------------------------------------------------------------------------------------------------------------------------------------------------------------------------------------------------------------------------------------------------------------------------------------------------------------------------------------------------------------------------------------------------------|
| <b>Methods</b>       | <b>Parallel study design</b> of reduced sodium diet and participants randomized to sodium tablets or placebo tablets in addition to either olive oil tablets or fish oil tablets. Conducted in Australia                                                                                                                                                                                                                      |
| <b>Participants</b>  | 61 hypertensive adults who were being medically treated with ACE inhibitors                                                                                                                                                                                                                                                                                                                                                   |
| <b>Interventions</b> | Group1 -- reduced sodium diet plus olive oil and 80 mmol Na in tablets / day (olive control)<br>Group2 -- reduced sodium diet plus olive oil and placebo tablets / day (olive reduced sodium)<br>Group3 -- reduced sodium diet plus fish oil and 80 mmol sodium in tablets / day (fish control)<br>Group4 -- reduced sodium diet plus fish oil and placebo tablets / day (fish reduced sodium)                                |
| <b>Outcomes</b>      | Resting blood pressure<br>Plasma total cholesterol<br>Plasma triglycerides<br>Serum thromboxanes<br>Plasma aldosterone<br>Urinary creatinine                                                                                                                                                                                                                                                                                  |
| <b>Notes</b>         | 1) Sodium reduction achieved - <u>&gt;1/3 of control</u><br>- <u>&lt; 2g / d in intervention</u><br>- <u>&gt; 1.2 g/d in intervention</u><br>2) Age- <b>Adult (15 yrs or greater)</b><br>3) Group - <b>hypertensive</b><br>4) Duration of follow-up (in months) - <b>1.5 months</b><br>5) Sex - <b>both (heterogeneous)</b><br>6) Blood pressure method - <b>automatic</b><br>7) Blood pressure method - <b>seated office</b> |

Risk of bias table

| <b>Bias</b>                                               | <b>Authors' judgement</b> | <b>Support for judgement</b>                                                                |
|-----------------------------------------------------------|---------------------------|---------------------------------------------------------------------------------------------|
| Random sequence generation (selection bias)               | Low risk                  | Computer generated randomization schedule                                                   |
| Allocation concealment (selection bias)                   | Low risk                  | Concealed by dispensing in masked, individually coded containers                            |
| Blinding of participants and personnel (performance bias) | Low risk                  | Participants and personnel blinded                                                          |
| Blinding of outcome assessment (detection bias)           | Low risk                  | Outcome assessor blinded                                                                    |
| Incomplete outcome data (attrition bias)                  | Unclear risk              | 8% loss to follow-up but not clear from which group.                                        |
| Selective reporting (reporting bias)                      | Low risk                  | Noted there was no change in Cholesterol or triglycerides but did not quantify the results. |

MACGREGOR 1982

|                      |                                                                                                                                                                                                                                                                                                                                                                                                                                                       |
|----------------------|-------------------------------------------------------------------------------------------------------------------------------------------------------------------------------------------------------------------------------------------------------------------------------------------------------------------------------------------------------------------------------------------------------------------------------------------------------|
| <b>Methods</b>       | <b>Cross-over study design</b> of reduced sodium diet and participants randomized to sodium tablets or placebo tablets. Any one individual took the same number of tablets each day, but between individuals the amount varied from 70 to 120 mmol sodium per day. Conducted in the United Kingdom.                                                                                                                                                   |
| <b>Participants</b>  | 19 hypertensive adults not taking medical treatment for hypertension.                                                                                                                                                                                                                                                                                                                                                                                 |
| <b>Interventions</b> | Group1 -- reduced sodium diet plus sodium tablets to restore baseline sodium intake (control)<br>Group2 -- reduced sodium diet plus placebo tablets (reduced sodium)                                                                                                                                                                                                                                                                                  |
| <b>Outcomes</b>      | Resting blood pressure<br>Pulse rate<br>Urinary creatinine excretion<br>Plasma urea<br>Plasma creatinine<br>Plasma renin activity<br>Plasma aldosterone                                                                                                                                                                                                                                                                                               |
| <b>Notes</b>         | 1) Sodium reduction achieved - <u>&gt;1/3 of control</u><br>- <u>&lt; 2g / d in intervention</u><br>- <u>&gt; 1.2 g/d in intervention</u><br>2) Age- <b>Adult (15 yrs or greater)</b><br>3) Group - <b>hypertensive</b><br>4) Duration of follow-up (in months) – <b>1 month</b><br>5) Sex - <b>both (heterogeneous)</b><br>6) Blood pressure method - <b>automatic</b><br>7) Blood pressure method - <b>supine office</b> and <b>standing office</b> |

Risk of bias table

| <b>Bias</b>                                               | <b>Authors' judgement</b> | <b>Support for judgement</b>                          |
|-----------------------------------------------------------|---------------------------|-------------------------------------------------------|
| Random sequence generation (selection bias)               | Unclear risk              | No description of method of sequence generation       |
| Allocation concealment (selection bias)                   | Unclear risk              | No description of method of concealment of allocation |
| Blinding of participants and personnel (performance bias) | Low risk                  | Providers and participants were blinded               |
| Blinding of outcome assessment (detection bias)           | Unclear risk              | Unclear if outcome assessors were blinded             |
| Incomplete outcome data (attrition bias)                  | Low risk                  | Loss to follow-up reported as 0%                      |
| Selective reporting (reporting bias)                      | Low risk                  | All outcomes reported                                 |

MACGREGOR 1989

|                      |                                                                                                                                                                                                                                                                                                                                                                                                                                                                                                                                                                                                         |
|----------------------|---------------------------------------------------------------------------------------------------------------------------------------------------------------------------------------------------------------------------------------------------------------------------------------------------------------------------------------------------------------------------------------------------------------------------------------------------------------------------------------------------------------------------------------------------------------------------------------------------------|
| <b>Methods</b>       | <b>Cross-over study design</b> of reduced sodium diet and participants randomized to 160 mmol sodium in tablets, 70 mmol sodium in tablets or placebo in tablets. Conducted in the United Kingdom.                                                                                                                                                                                                                                                                                                                                                                                                      |
| <b>Participants</b>  | 20 hypertensives adults not taking medical therapy to control blood pressure                                                                                                                                                                                                                                                                                                                                                                                                                                                                                                                            |
| <b>Interventions</b> | Group1 -- reduced sodium diet plus 160 mmol sodium in tablets / day (control)<br>Group2 -- reduced sodium diet plus 70mmol sodium + 9 placebo tablets / day (reduced sodium)<br>Group3 -- reduced sodium diet plus 16 placebo tablets / day (very reduced sodium)                                                                                                                                                                                                                                                                                                                                       |
| <b>Outcomes</b>      | Resting blood pressure<br>Pulse rate<br>Urinary creatinine excretion<br>Plasma urea<br>Plasma creatinine<br>Plasma noradrenaline<br>Plasma renin activity<br>Plasma aldosterone                                                                                                                                                                                                                                                                                                                                                                                                                         |
| <b>Notes</b>         | 1) Sodium reduction achieved<br>reduced sodium - <b>&gt;1/3 of control</b><br>- <b>&gt;2g/d in intervention</b><br>- <b>&gt; 1.2 g/d in intervention</b><br>very reduced sodium - <b>&gt;1/3 of control</b><br>- <b>&lt; 2g / d in intervention</b><br>- <b>&lt;1.2 g/d in intervention</b><br>2) Age- <b>Adult (15 yrs or greater)</b><br>3) Group - <b>hypertensive</b><br>4) Duration of follow-up (in months) - <b>1 month</b><br>5) Sex - <b>both (heterogeneous)</b><br>6) Blood pressure method - <b>automatic</b><br>7) Blood pressure method - <b>supine office</b> and <b>standing office</b> |

Risk of bias table

| <b>Bias</b>                                               | <b>Authors' judgement</b> | <b>Support for judgement</b>                          |
|-----------------------------------------------------------|---------------------------|-------------------------------------------------------|
| Random sequence generation (selection bias)               | Unclear risk              | No description of method of sequence generation       |
| Allocation concealment (selection bias)                   | Unclear risk              | No description of method of concealment of allocation |
| Blinding of participants and personnel (performance bias) | Low risk                  | Providers and participants were blinded               |
| Blinding of outcome assessment (detection bias)           | Unclear risk              | Unclear if outcome assessors were blinded             |
| Incomplete outcome data (attrition bias)                  | Low risk                  | Loss to follow-up reported as 0%                      |
| Selective reporting (reporting bias)                      | Low risk                  | All outcomes reported                                 |

MCCARRON 1997

|                     |                                                                                                                                                                        |
|---------------------|------------------------------------------------------------------------------------------------------------------------------------------------------------------------|
| <b>Methods</b>      | <b>Cross-over study design</b> of reduced sodium diet and participants randomly assigned sodium tablets or placebo tablets. Conducted in the United States of America. |
| <b>Participants</b> | 99 hypertensive adults given isradipine (calcium channel blocker) to reduce blood pressure.                                                                            |



MELAND 1997

|                      |                                                                                                                                                                                                                                                                                                                                                                                                                       |
|----------------------|-----------------------------------------------------------------------------------------------------------------------------------------------------------------------------------------------------------------------------------------------------------------------------------------------------------------------------------------------------------------------------------------------------------------------|
| <b>Methods</b>       | <b>Cross-over study design</b> of reduced sodium diet and participants randomized to sodium tablets or placebo tablets. Conducted in Norway.                                                                                                                                                                                                                                                                          |
| <b>Participants</b>  | 16 hypertensive adults not receiving medical therapy for hypertension.                                                                                                                                                                                                                                                                                                                                                |
| <b>Interventions</b> | Group1 -- reduced sodium diet plus 50 mmol/day sodium tablets (control)<br>Group2 -- reduced sodium diet plus placebo (reduced sodium)                                                                                                                                                                                                                                                                                |
| <b>Outcomes</b>      | Resting blood pressure<br>Urinary creatinine excretion<br>Plasma creatinine<br>Serum total cholesterol<br>Serum HDL<br>Serum glucose<br>Serum insulin C-peptide<br>Serum insulin                                                                                                                                                                                                                                      |
| <b>Notes</b>         | 1) Sodium reduction achieved - <b>&gt;1/3 of control</b><br>- <b>&gt;2g/d in intervention</b><br>- <b>&gt; 1.2 g/d in intervention</b><br>2) Age- <b>Adult (15 yrs or greater)</b><br>3) Group - <b>hypertensive</b><br>4) Duration of follow-up (in months) – <b>2 months</b><br>5) Sex - <b>both (heterogeneous)</b><br>6) Blood pressure method - <b>manual</b><br>7) Blood pressure method - <b>seated office</b> |

Risk of bias table

| <b>Bias</b>                                               | <b>Authors' judgement</b> | <b>Support for judgement</b>                          |
|-----------------------------------------------------------|---------------------------|-------------------------------------------------------|
| Random sequence generation (selection bias)               | Unclear risk              | No description of method of sequence generation       |
| Allocation concealment (selection bias)                   | Unclear risk              | No description of method of concealment of allocation |
| Blinding of participants and personnel (performance bias) | Low risk                  | Providers and participants were blinded               |
| Blinding of outcome assessment (detection bias)           | Low risk                  | Outcome assessors were blinded                        |
| Incomplete outcome data (attrition bias)                  | Low risk                  | Loss to follow-up reported as 0%                      |
| Selective reporting (reporting bias)                      | Low risk                  | All primary outcomes reported                         |

MELAND 2009

|                      |                                                                                                                                                                                                                                                                                                                                                                                                                     |
|----------------------|---------------------------------------------------------------------------------------------------------------------------------------------------------------------------------------------------------------------------------------------------------------------------------------------------------------------------------------------------------------------------------------------------------------------|
| <b>Methods</b>       | <b>Parallel study design</b> of reduced sodium diet and participants randomized to sodium tablets or placebo tablets. Conducted in Norway.                                                                                                                                                                                                                                                                          |
| <b>Participants</b>  | 46 hypertensive adults possibly taking medical therapy to control blood pressure.                                                                                                                                                                                                                                                                                                                                   |
| <b>Interventions</b> | Group1 -- reduced sodium diet plus 50 mmol sodium in tablets / day (control)<br>Group2 -- reduced sodium diet plus placebo tablets / day (reduced sodium)                                                                                                                                                                                                                                                           |
| <b>Outcomes</b>      | Resting blood pressure<br>Serum aldosterone<br>Fasting serum insulin C-peptide<br>Fasting serum glucose<br>Serum total cholesterol<br>Serum HDL cholesterol<br>Serum total triglycerides                                                                                                                                                                                                                            |
| <b>Notes</b>         | 1) Sodium reduction achieved - <u>&gt;1/3 of control</u><br>- <u>&lt; 2g / d in intervention</u><br>- <u>&gt; 1.2 g/d in intervention</u><br>2) Age- <b>Adult (15 yrs or greater)</b><br>3) Group - <b>hypertensive</b><br>4) Duration of follow-up (in months) - <b>2 month</b><br>5) Sex - <b>both (heterogeneous)</b><br>6) Blood pressure method <b>manual</b><br>7) Blood pressure method <b>seated office</b> |

Risk of bias table

| <b>Bias</b>                                               | <b>Authors' judgement</b> | <b>Support for judgement</b>                          |
|-----------------------------------------------------------|---------------------------|-------------------------------------------------------|
| Random sequence generation (selection bias)               | Unclear risk              | No description of method of sequence generation       |
| Allocation concealment (selection bias)                   | Unclear risk              | No description of method of concealment of allocation |
| Blinding of participants and personnel (performance bias) | Low risk                  | Providers and participants were blinded.              |
| Blinding of outcome assessment (detection bias)           | Low risk                  | Outcome assessors were blinded.                       |
| Incomplete outcome data (attrition bias)                  | Low risk                  | Loss to follow-up reported as 0%.                     |
| Selective reporting (reporting bias)                      | Low risk                  | All outcomes reported                                 |

|                      |                                                                                                                                                                                                                                                                                                                                                                                                                                                                                                                          |
|----------------------|--------------------------------------------------------------------------------------------------------------------------------------------------------------------------------------------------------------------------------------------------------------------------------------------------------------------------------------------------------------------------------------------------------------------------------------------------------------------------------------------------------------------------|
| <b>Methods</b>       | <b>Cross-over study design</b> of reduced sodium diet and participants randomized to sodium tablets or placebo tablets. Conducted in Sweden.                                                                                                                                                                                                                                                                                                                                                                             |
| <b>Participants</b>  | 46 normotensive adults without history of hypertension, diabetes or kidney disease or taking medication for those conditions.                                                                                                                                                                                                                                                                                                                                                                                            |
| <b>Interventions</b> | Group1 -- reduced sodium diet plus 100 mmol/day sodium tablets (control)<br>Group2 -- reduced sodium diet plus placebo (reduced sodium)                                                                                                                                                                                                                                                                                                                                                                                  |
| <b>Outcomes</b>      | Resting blood pressure<br>Ambulatory blood pressure<br>Urinary creatinine excretion<br>Glomerular filtration rate<br>Serum creatinine<br>Serum electrolytes<br>Plasma renin activity<br>Plasma aldosterone.                                                                                                                                                                                                                                                                                                              |
| <b>Notes</b>         | 1) Sodium reduction achieved - <b>&gt;1/3 of control</b><br>- <b>&lt; 2g / d in intervention</b><br>- <b>&lt;1.2 g/d in intervention</b><br>2) Age- <b>Adult (15 yrs or greater)</b><br>3) Group - <b>Normotensive</b><br>4) Duration of follow-up (in months) – <b>1 month</b><br>5) Sex - <b>both (heterogeneous)</b><br>6) Blood pressure method - <b>automatic (ambulatory) / manual (office)</b><br>7) Blood pressure method - <b>supine office</b> and <b>ambulatory 24 hr / ambulatory day / ambulatory night</b> |

Risk of bias table

| <b>Bias</b>                                               | <b>Authors' judgement</b> | <b>Support for judgement</b>                                     |
|-----------------------------------------------------------|---------------------------|------------------------------------------------------------------|
| Random sequence generation (selection bias)               | Unclear risk              | No description of method of sequence generation                  |
| Allocation concealment (selection bias)                   | Unclear risk              | No description of method of concealment of allocation            |
| Blinding of participants and personnel (performance bias) | Low risk                  | Providers and participants were blinded                          |
| Blinding of outcome assessment (detection bias)           | Unclear risk              | Unclear if outcome assessors were blinded                        |
| Incomplete outcome data (attrition bias)                  | High risk                 | >15% loss to follow-up and unclear from which intervention phase |
| Selective reporting (reporting bias)                      | Low risk                  | All outcomes reported.                                           |



MORGAN 1981

|                      |                                                                                                                                                                                                                                                                                                                                                                                                                                       |
|----------------------|---------------------------------------------------------------------------------------------------------------------------------------------------------------------------------------------------------------------------------------------------------------------------------------------------------------------------------------------------------------------------------------------------------------------------------------|
| <b>Methods</b>       | <b>Crossover design study</b> of reduced sodium diet and participants randomized to receive sodium tablets or placebo tablets. Conducted in the Australia.                                                                                                                                                                                                                                                                            |
| <b>Participants</b>  | 48 hypertensive adults 28 - 50 years of age some of whom were taking medical therapy to control hypertension.                                                                                                                                                                                                                                                                                                                         |
| <b>Interventions</b> | Group1 -- reduced sodium diet plus 50 mmol/day sodium tablets (control)<br>Group2 -- reduced sodium diet plus placebo tablets (reduced sodium)                                                                                                                                                                                                                                                                                        |
| <b>Outcomes</b>      | Resting diastolic blood pressures<br>Urinary urea concentration<br>Urinary creatinine concentration                                                                                                                                                                                                                                                                                                                                   |
| <b>Notes</b>         | 1) Sodium reduction achieved - <u>&gt;1/3 of control</u><br>- <u>&gt;2g/d in intervention</u><br>- <u>&gt; 1.2 g/d in intervention</u><br>2) Age- <b>Adult (15 yrs or greater)</b><br>3) Group - <b>hypertensive</b><br>4) Duration of follow-up (in months) – <b>2 months</b><br>5) Sex - male / female / <b>both (heterogeneous)</b><br>6) Blood pressure method - <b>manual</b><br>7) Blood pressure method - <b>supine office</b> |

Risk of bias table

| <b>Bias</b>                                               | <b>Authors' judgement</b> | <b>Support for judgement</b>                          |
|-----------------------------------------------------------|---------------------------|-------------------------------------------------------|
| Random sequence generation (selection bias)               | Unclear risk              | No description of method of sequence generation       |
| Allocation concealment (selection bias)                   | Unclear risk              | No description of method of concealment of allocation |
| Blinding of participants and personnel (performance bias) | High risk                 | Participants and providers were not blinded           |
| Blinding of outcome assessment (detection bias)           | Low risk                  | Outcome assessors were blinded                        |
| Incomplete outcome data (attrition bias)                  | Unclear risk              | No report of amount loss to follow-up                 |
| Selective reporting (reporting bias)                      | High risk                 | Systolic blood pressure not reported                  |

|                      |                                                                                                                                                                                                                                                                                                                                                                                                                                                                         |
|----------------------|-------------------------------------------------------------------------------------------------------------------------------------------------------------------------------------------------------------------------------------------------------------------------------------------------------------------------------------------------------------------------------------------------------------------------------------------------------------------------|
| <b>Methods</b>       | <b>Parallel design study</b> of reduced sodium diet and participants randomized to receive sodium tablets or placebo tablets. Conducted in Germany.                                                                                                                                                                                                                                                                                                                     |
| <b>Participants</b>  | 16 hypertensive adults with IDDM not taking medical therapy to control blood pressure.                                                                                                                                                                                                                                                                                                                                                                                  |
| <b>Interventions</b> | Group1 -- reduced sodium diet plus 100mmol/day Na tablets (control)<br>Group2 -- reduced sodium diet plus placebo tablets (reduced sodium)                                                                                                                                                                                                                                                                                                                              |
| <b>Outcomes</b>      | Resting blood pressure<br>HbAc<br>Insulin dosage<br>Serum cholesterol<br>Serum HDL<br>Proteinuria,<br>Urinary creatinine-clearance<br>Glomerular filtration rate (GFR)<br>Renal plasma flow<br>Filtration fraction<br>Renal vascular resistance<br>Plasma aldosterone<br>Plasma total rennin activity,<br>Plasma angiotensin converting enzyme<br>Plasma antiotensin II<br>Atrial natriuretic peptide<br>Plasma adrenaline<br>Plasma noradrenaline                      |
| <b>Notes</b>         | 1) Sodium reduction achieved - <b>&gt;1/3 of control / both</b><br>- <b>&gt;2g/d in intervention</b><br>- <b>&gt; 1.2 g/d in intervention</b><br>2) Age- <b>Adult (15 yrs or greater)</b><br>3) Group - <b>both</b><br>4) Duration of follow-up (in months) - <b>1 month</b><br>5) Sex - <b>both (heterogeneous)</b><br>6) Blood pressure method - <b>automatic (home) / manual (office)</b><br>7) Blood pressure method - <b>combination office / combination home</b> |

Risk of bias table

| <b>Bias</b>                                               | <b>Authors' judgement</b> | <b>Support for judgement</b>                          |
|-----------------------------------------------------------|---------------------------|-------------------------------------------------------|
| Random sequence generation (selection bias)               | Low risk                  | Computer generation of sequence                       |
| Allocation concealment (selection bias)                   | Unclear risk              | No description of method of concealment of allocation |
| Blinding of participants and personnel (performance bias) | Low risk                  | Participants and providers were blinded               |
| Blinding of outcome assessment (detection bias)           | Low risk                  | Outcome assessors were blinded.                       |
| Incomplete outcome data (attrition bias)                  | Low risk                  | Loss to follow-up reported as 0%                      |
| Selective reporting (reporting bias)                      | Low risk                  | All outcomes reported                                 |

NESTEL 1993

|                      |                                                                                                                                                                                                                                                                                                                                                                                                                           |
|----------------------|---------------------------------------------------------------------------------------------------------------------------------------------------------------------------------------------------------------------------------------------------------------------------------------------------------------------------------------------------------------------------------------------------------------------------|
| <b>Methods</b>       | <b>Parallel study design</b> of reduced sodium diet and participants randomized to sodium tablets or placebo tablets and either safflower oil or dihomogammalinolenic acid (DGLA).                                                                                                                                                                                                                                        |
| <b>Participants</b>  | 66 normotensive older adults (60-79 years) not taking medical therapy to control blood pressure.                                                                                                                                                                                                                                                                                                                          |
| <b>Interventions</b> | Group1 -- reduced sodium diet plus sodium tablets and DGLA or safflower oil (control)<br>Group2 -- reduced sodium diet plus placebo tablets and DGLA or safflower oil (reduced sodium)                                                                                                                                                                                                                                    |
| <b>Outcomes</b>      | Resting blood pressure<br>Plasma total cholesterol<br>Plasma HDL<br>Plasma triglycerides<br>Plasma fatty acid profile                                                                                                                                                                                                                                                                                                     |
| <b>Notes</b>         | 1) Sodium reduction achieved - <b>&gt;1/3 of control</b><br>- <b>&gt;2g/d in intervention</b><br>- <b>&gt; 1.2 g/d in intervention</b><br>2) Age- <b>Adult (15 yrs or greater)</b><br>3) Group - <b>Normotensive</b><br>4) Duration of follow-up (in months) - <b>1.5 month</b><br>5) Sex - <b>both (heterogeneous)</b><br>6) Blood pressure method - <b>automatic</b><br>7) Blood pressure method - <b>seated office</b> |

Risk of bias table

| <b>Bias</b>                                               | <b>Authors' judgement</b> | <b>Support for judgement</b>                          |
|-----------------------------------------------------------|---------------------------|-------------------------------------------------------|
| Random sequence generation (selection bias)               | Unclear risk              | No description of method of sequence generation       |
| Allocation concealment (selection bias)                   | Unclear risk              | No description of method of concealment of allocation |
| Blinding of participants and personnel (performance bias) | Low risk                  | Providers and participants were blinded.              |
| Blinding of outcome assessment (detection bias)           | Unclear risk              | Unclear if outcome assessors were blinded.            |
| Incomplete outcome data (attrition bias)                  | Low risk                  | Loss to follow-up reported as 0%                      |
| Selective reporting (reporting bias)                      | High risk                 | Cholesterol, HDL, and triglycerides not reported      |

PARIJS 1973

|                      |                                                                                                                                                                                                                                                                                                                                                                                                                                                                                                                                                                                                    |
|----------------------|----------------------------------------------------------------------------------------------------------------------------------------------------------------------------------------------------------------------------------------------------------------------------------------------------------------------------------------------------------------------------------------------------------------------------------------------------------------------------------------------------------------------------------------------------------------------------------------------------|
| <b>Methods</b>       | <b>Cross-over study</b> design with four intervention periods. During two intervention periods, participants consumed a normal sodium diet and during two intervention periods, participants consumed a reduced sodium diet. During each type of diet consumption, there was one period with placebo consumption and one period with diuretic consumption. Conducted in Belgium.                                                                                                                                                                                                                   |
| <b>Participants</b>  | 22 hypertensive adults.                                                                                                                                                                                                                                                                                                                                                                                                                                                                                                                                                                            |
| <b>Interventions</b> | Group1 -- normal sodium diet plus placebo tablets / day (control-placebo)<br>Group2 -- reduced sodium diet plus placebo tablets / day (reduced sodium-placebo)<br>Group3 -- normal sodium diet plus diuretic in tablets / day (control-diuretic)<br>Group4 -- reduced sodium diet plus diuretic in tablets / day (reduced sodium-diuretic)                                                                                                                                                                                                                                                         |
| <b>Outcomes</b>      | Resting blood pressure<br>Serum electrolytes<br>Serum uric acid<br>Urinary creatinine excretion<br>Uric acid clearance                                                                                                                                                                                                                                                                                                                                                                                                                                                                             |
| <b>Notes</b>         | 1) Sodium reduction achieved<br>No medication phase - <u>&gt;1/3 of control</u><br>- <u>&gt;2g/d in intervention</u><br>- <u>&gt; 1.2 g/d in intervention</u><br>Diuretic phase - <u>&lt;1/3 of control</u><br>- <u>&gt;2g/d in intervention</u><br>- <u>&gt; 1.2 g/d in intervention</u><br>2) Age- <b>Adult (15 yrs or greater)</b><br>3) Group - <b>hypertensive</b><br>4) Duration of follow-up (in months) - <b>1 month</b><br>5) Sex - <b>both (heterogeneous)</b><br>6) Blood pressure method - <b>manual</b><br>7) Blood pressure method - <b>supine office</b> and <b>standing office</b> |

Risk of bias table

| <b>Bias</b>                                               | <b>Authors' judgement</b> | <b>Support for judgement</b>                                                                                             |
|-----------------------------------------------------------|---------------------------|--------------------------------------------------------------------------------------------------------------------------|
| Random sequence generation (selection bias)               | Unclear risk              | Intervention group decided by odd or even number. Manner that numbers were generated and given to participants not clear |
| Allocation concealment (selection bias)                   | High risk                 | Allocation was based on odd/even number already known by trialist.                                                       |
| Blinding of participants and personnel (performance bias) | High risk                 | Personnel and participants not blinded to diet treatment                                                                 |
| Blinding of outcome assessment (detection bias)           | High risk                 | Outcomes assessors not blinded to diet treatment.                                                                        |
| Incomplete outcome data (attrition bias)                  | High risk                 | Los to follow-up > 20% in all groups                                                                                     |
| Selective reporting (reporting bias)                      | Low risk                  | All outcomes reported                                                                                                    |

PUSKA 1983

|                     |                                                                                                                            |
|---------------------|----------------------------------------------------------------------------------------------------------------------------|
| <b>Methods</b>      | <b>Parallel study design</b> with randomization to usual diet, reduced sodium diet, or low fat diet. Conducted in Finland. |
| <b>Participants</b> | 72 adults (in control and reduced sodium groups. 114 total) with no major                                                  |

|                      |                                                                                                                                                                                                                                                                                                                                                                                                                      |
|----------------------|----------------------------------------------------------------------------------------------------------------------------------------------------------------------------------------------------------------------------------------------------------------------------------------------------------------------------------------------------------------------------------------------------------------------|
|                      | health problems and not taking medical therapy for hypertension. (couples were the unit of randomization)                                                                                                                                                                                                                                                                                                            |
| <b>Interventions</b> | Group1 -- maintain "normal" diet (control)<br>Group2 -- reduced sodium diet achieved through counselling and provision of "key" low salt options (reduced sodium)<br>Group3 -- low fat diet achieved through counselling and provision of "key" low fat options (low fat) (results not included in this review)                                                                                                      |
| <b>Outcomes</b>      | Resting blood pressure                                                                                                                                                                                                                                                                                                                                                                                               |
| <b>Notes</b>         | 1) Sodium reduction achieved - <u>&gt;1/3 of control</u><br>- <u>&lt; 2g / d in intervention</u><br>- <u>&gt; 1.2 g/d in intervention</u><br>2) Age- <b>Adult (15 yrs or greater)</b><br>3) Group - <b>both</b><br>4) Duration of follow-up (in months) – <b>1.5 month</b><br>5) Sex - <b>both (heterogeneous)</b><br>6) Blood pressure method - <b>automatic</b><br>7) Blood pressure method - <b>seated office</b> |

Risk of bias table

| <b>Bias</b>                                               | <b>Authors' judgement</b> | <b>Support for judgement</b>                          |
|-----------------------------------------------------------|---------------------------|-------------------------------------------------------|
| Random sequence generation (selection bias)               | Unclear risk              | No description of method of sequence generation       |
| Allocation concealment (selection bias)                   | Unclear risk              | No description of method of concealment of allocation |
| Blinding of participants and personnel (performance bias) | High risk                 | Providers and participants were not blinded           |
| Blinding of outcome assessment (detection bias)           | Low risk                  | Outcome assessors blinded                             |
| Incomplete outcome data (attrition bias)                  | Low risk                  | <10% loss to follow-up                                |
| Selective reporting (reporting bias)                      | Low risk                  | All outcomes reported                                 |

RICHARDS 1984

|                      |                                                                                                                                                                                                                                                                                                                                                                                                                                                                                                                      |
|----------------------|----------------------------------------------------------------------------------------------------------------------------------------------------------------------------------------------------------------------------------------------------------------------------------------------------------------------------------------------------------------------------------------------------------------------------------------------------------------------------------------------------------------------|
| <b>Methods</b>       | <b>Cross-over study design</b> with dietary manipulation to have usual sodium intake, reduced sodium intake, or increased potassium intake. Conducted in New Zealand.                                                                                                                                                                                                                                                                                                                                                |
| <b>Participants</b>  | 16 hypertensive adults not taking medical therapy for hypertension.                                                                                                                                                                                                                                                                                                                                                                                                                                                  |
| <b>Interventions</b> | Group1 -- control diet with sodium target of 180 mmol/day + 60mmol K/day (control)<br>Group2 -- reduced sodium diet with sodium target of 80 mmol /day + 60mmol K/day (reduced sodium)<br>Group 3 -- high potassium diet with sodium target of 180 mmol/day and 200 mmol K / day (high potassium - results not included in this review)                                                                                                                                                                              |
| <b>Outcomes</b>      | Resting blood pressure<br>Plasma rennin activity<br>Plasma noradrenaline<br>Plasma adrenaline<br>Plasma aldosterone<br>Plasma angiotensin II<br>Mean intra-arterial pressure<br>Plasma electrolytes                                                                                                                                                                                                                                                                                                                  |
| <b>Notes</b>         | 1) Sodium reduction achieved* - <b>&gt;1/3 of control</b><br>- <b>&gt;2g/d in intervention</b><br>- <b>&gt; 1.2 g/d in intervention</b><br>2) Age- <b>Adult (15 yrs or greater)</b><br>3) Group - <b>hypertensive</b><br>4) Duration of follow-up (in months) - <b>1-1.5 months</b><br>5) Sex - <b>both (heterogeneous)</b><br>6) Blood pressure method - <b>automatic</b><br>7) Blood pressure method - <b>supine office</b> and <b>standing office</b><br>*Values estimated based on figure provided in manuscript |

Risk of bias table

| <b>Bias</b>                                               | <b>Authors' judgement</b> | <b>Support for judgement</b>                          |
|-----------------------------------------------------------|---------------------------|-------------------------------------------------------|
| Random sequence generation (selection bias)               | Unclear risk              | No description of method of sequence generation       |
| Allocation concealment (selection bias)                   | Unclear risk              | No description of method of concealment of allocation |
| Blinding of participants and personnel (performance bias) | High risk                 | Providers and participants were not blinded           |
| Blinding of outcome assessment (detection bias)           | Unclear risk              | Unclear if outcome assessors were blinded             |
| Incomplete outcome data (attrition bias)                  | High risk                 | 25% loss to follow-up                                 |
| Selective reporting (reporting bias)                      | Low risk                  | All outcomes reported                                 |

RUPPERT 1993

|                      |                                                                                                                                                                                                                                                                                                                                                                                                                            |
|----------------------|----------------------------------------------------------------------------------------------------------------------------------------------------------------------------------------------------------------------------------------------------------------------------------------------------------------------------------------------------------------------------------------------------------------------------|
| <b>Methods</b>       | <b>Cross-over study design</b> with participants provided diets of 85mmol sodium and randomized to sodium tablets or placebo tablets. Conducted in Germany                                                                                                                                                                                                                                                                 |
| <b>Participants</b>  | 25 non-hypertensive adults not taking medical therapy to reduce blood pressure.                                                                                                                                                                                                                                                                                                                                            |
| <b>Interventions</b> | Group1 -- diet of 85 mmol sodium plus 115 mmol sodium/day in tablet (control)<br>Group2 -- diet of 85 mmol sodium plus placebo in tablet (reduced sodium)                                                                                                                                                                                                                                                                  |
| <b>Outcomes</b>      | Resting blood pressure<br>Mean arterial pressure<br>Heart rate<br>Plasma renin activity<br>Plasma noradrenaline<br>Serum total cholesterol<br>Serum LDL<br>Serum HDL<br>Serum triglycerides<br>Serum total protein                                                                                                                                                                                                         |
| <b>Notes</b>         | 1) Sodium reduction achieved - <b>&gt;1/3 of control</b><br>- <b>&lt; 2g / d in intervention</b><br>- <b>&gt; 1.2 g/d in intervention</b><br>2) Age- <b>Adult (15 yrs or greater)</b><br>3) Group - <b>Normotensive</b><br>4) Duration of follow-up (in months) – <b>1 month</b><br>5) Sex - <b>both (heterogeneous)</b><br>6) Blood pressure method - <b>automatic</b><br>7) Blood pressure method - <b>seated office</b> |

Risk of bias table

| <b>Bias</b>                                               | <b>Authors' judgement</b> | <b>Support for judgement</b>                          |
|-----------------------------------------------------------|---------------------------|-------------------------------------------------------|
| Random sequence generation (selection bias)               | Unclear risk              | No description of method of sequence generation       |
| Allocation concealment (selection bias)                   | Unclear risk              | No description of method of concealment of allocation |
| Blinding of participants and personnel (performance bias) | Low risk                  | Providers and participants were blinded               |
| Blinding of outcome assessment (detection bias)           | Low risk                  | Outcome assessors were blinded                        |
| Incomplete outcome data (attrition bias)                  | Low risk                  | Loss to follow-up reported as 0%                      |
| Selective reporting (reporting bias)                      | Low risk                  | All outcomes reported                                 |





|                      |                                                                                                                                                                                                                                                                                                                                                                                                                                                                                                                                                                                                                                                                                                                                                                                                                                                                                                                                                                                                                                                                                                            |
|----------------------|------------------------------------------------------------------------------------------------------------------------------------------------------------------------------------------------------------------------------------------------------------------------------------------------------------------------------------------------------------------------------------------------------------------------------------------------------------------------------------------------------------------------------------------------------------------------------------------------------------------------------------------------------------------------------------------------------------------------------------------------------------------------------------------------------------------------------------------------------------------------------------------------------------------------------------------------------------------------------------------------------------------------------------------------------------------------------------------------------------|
| <b>Methods</b>       | <b>Parallel study design</b> with participants randomized to reduced sodium dietary education to reduce sodium intake or to control healthy lifestyle education. Conducted in the United Kingdom.                                                                                                                                                                                                                                                                                                                                                                                                                                                                                                                                                                                                                                                                                                                                                                                                                                                                                                          |
| <b>Participants</b>  | 28 adults with hypertension who were not taking medical therapy for blood pressure.                                                                                                                                                                                                                                                                                                                                                                                                                                                                                                                                                                                                                                                                                                                                                                                                                                                                                                                                                                                                                        |
| <b>Interventions</b> | Group1 -- healthy lifestyle education (control)<br>Group2 -- education to reach reduced sodium diet plus healthy lifestyle education (reduced sodium)                                                                                                                                                                                                                                                                                                                                                                                                                                                                                                                                                                                                                                                                                                                                                                                                                                                                                                                                                      |
| <b>Outcomes</b>      | Resting blood pressure                                                                                                                                                                                                                                                                                                                                                                                                                                                                                                                                                                                                                                                                                                                                                                                                                                                                                                                                                                                                                                                                                     |
| <b>Notes</b>         | <p><b>1) Sodium intake achieved</b></p> <p><b>1 months - &lt;1/3 of control</b></p> <ul style="list-style-type: none"> <li>- <u>&gt;2g/d in intervention</u></li> <li>- <u>&gt; 1.2 g/d in intervention</u></li> </ul> <p><b>3 months - &gt;1/3 of control</b></p> <ul style="list-style-type: none"> <li>- <u>&gt;2g/d in intervention</u></li> <li>- <u>&gt; 1.2 g/d in intervention</u></li> </ul> <p><b>6 months - &lt;1/3 of control</b></p> <ul style="list-style-type: none"> <li>- <u>&gt;2g/d in intervention</u></li> <li>- <u>&gt; 1.2 g/d in intervention</u></li> </ul> <p><b>12 months - &lt;1/3 of control</b></p> <ul style="list-style-type: none"> <li>- <u>&gt;2g/d in intervention</u></li> <li>- <u>&gt; 1.2 g/d in intervention</u></li> </ul> <p>2) Age- <b>Adult (15 yrs or greater)</b></p> <p>3) Group - <b>hypertensive</b></p> <p>4) Duration of follow-up (in months) – <b>1month/2months/3months/6months/12 months</b></p> <p>5) Sex - <b>both (heterogeneous)</b></p> <p>6) Blood pressure method - <b>manual</b></p> <p>7) Blood pressure method - <b>not reported</b></p> |

Risk of bias table

| <b>Bias</b>                                               | <b>Authors' judgement</b> | <b>Support for judgement</b>                          |
|-----------------------------------------------------------|---------------------------|-------------------------------------------------------|
| Random sequence generation (selection bias)               | Unclear risk              | No description of method of sequence generation       |
| Allocation concealment (selection bias)                   | Unclear risk              | No description of method of concealment of allocation |
| Blinding of participants and personnel (performance bias) | High risk                 | Providers and participants were not blinded           |
| Blinding of outcome assessment (detection bias)           | Unclear risk              | Unclear if outcome assessors were blinded             |
| Incomplete outcome data (attrition bias)                  | Low risk                  | 10% loss to follow-up                                 |
| Selective reporting (reporting bias)                      | Low risk                  | All outcomes reported                                 |

SUCKLING 2010

|                      |                                                                                                                                                                                                                                                                                                                                                                                                                                                                                                                                                                                                                                                                             |
|----------------------|-----------------------------------------------------------------------------------------------------------------------------------------------------------------------------------------------------------------------------------------------------------------------------------------------------------------------------------------------------------------------------------------------------------------------------------------------------------------------------------------------------------------------------------------------------------------------------------------------------------------------------------------------------------------------------|
| <b>Methods</b>       | <b>Cross-over design study</b> of reduced sodium diet and participants randomized to receive sodium tablets or placebo tablets. Conducted in the United Kingdom.                                                                                                                                                                                                                                                                                                                                                                                                                                                                                                            |
| <b>Participants</b>  | 26 Type II diabetics and 20 individuals with impaired glucose tolerance all with untreated normal or mild hypertension.                                                                                                                                                                                                                                                                                                                                                                                                                                                                                                                                                     |
| <b>Interventions</b> | Group1 -- reduced sodium diet plus unclear amount /day of sodium tablets (control)<br>Group2 -- reduced sodium diet plus placebo tablets (reduced sodium)                                                                                                                                                                                                                                                                                                                                                                                                                                                                                                                   |
| <b>Outcomes</b>      | Resting blood pressure<br>Ambulatory blood pressure<br>Urinary albumin excretion<br>Urinary albumin:creatinine ratio                                                                                                                                                                                                                                                                                                                                                                                                                                                                                                                                                        |
| <b>Notes</b>         | 1) Sodium reduction achieved - <b>&lt;1/3 of control</b><br>- <b>&gt;2g/d in intervention</b><br>- <b>&gt; 1.2 g/d in intervention</b><br>2) Age- <b>Adult (15 yrs or greater)</b><br>3) Group - <b>both</b><br>4) Duration of follow-up (in months) - <b>1.5 month</b><br>5) Sex - <b>both (heterogeneous)</b><br>6) Blood pressure method - <b>automatic (ambulatory)</b><br>7) Blood pressure method - <b>ambulatory 24 hr / ambulatory day / ambulatory night</b><br>*Publication was conference abstract and details on type of device used for resting BP and position of patient during measurement are unclear. Also, risk of bias cannot be assessed from abstract |

Risk of bias table

| <b>Bias</b>                                               | <b>Authors' judgement</b> | <b>Support for judgement</b>          |
|-----------------------------------------------------------|---------------------------|---------------------------------------|
| Random sequence generation (selection bias)               | Unclear risk              | Not sufficient data to make judgement |
| Allocation concealment (selection bias)                   | Unclear risk              | Not sufficient data to make judgement |
| Blinding of participants and personnel (performance bias) | Unclear risk              | Not sufficient data to make judgement |
| Blinding of outcome assessment (detection bias)           | Unclear risk              | Not sufficient data to make judgement |
| Incomplete outcome data (attrition bias)                  | Unclear risk              | Not sufficient data to make judgement |
| Selective reporting (reporting bias)                      | Unclear risk              | Not sufficient data to make judgement |

SWIFT 2005

|                      |                                                                                                                                                                                                                                                                                                                                                                                                                                                                                                                 |
|----------------------|-----------------------------------------------------------------------------------------------------------------------------------------------------------------------------------------------------------------------------------------------------------------------------------------------------------------------------------------------------------------------------------------------------------------------------------------------------------------------------------------------------------------|
| <b>Methods</b>       | <b>Cross-over study design</b> of reduced sodium diet and participants randomized to sodium tablets or placebo tablets. Conducted in the United Kingdom                                                                                                                                                                                                                                                                                                                                                         |
| <b>Participants</b>  | 46 hypertensive blacks not taking medical therapy to control blood pressure.                                                                                                                                                                                                                                                                                                                                                                                                                                    |
| <b>Interventions</b> | Group1 -- reduced sodium diet plus 120mmol sodium in tablets (control)<br>Group2 -- reduced sodium diet plus placebo tablets (reduced sodium)                                                                                                                                                                                                                                                                                                                                                                   |
| <b>Outcomes</b>      | Resting blood pressure<br>Ambulatory blood pressure (24hr, Day, Night)<br>Plasma renin activity<br>Plasma aldosterone<br>Atrial natriuretic peptide<br>Total urinary protein excretion<br>Urinary creatinine excretion                                                                                                                                                                                                                                                                                          |
| <b>Notes</b>         | 1) Sodium reduction achieved - <b>&gt;1/3 of control</b><br>- <b>&gt;2g/d in intervention</b><br>- <b>&gt; 1.2 g/d in intervention</b><br>2) Age- <b>Adult (15 yrs or greater)</b><br>3) Group - <b>hypertensive</b><br>4) Duration of follow-up (in months) – <b>1 month</b><br>5) Sex - <b>both (heterogeneous)</b><br>6) Blood pressure method - <b>automatic (ambulatory and office)</b><br>7) Blood pressure method - <b>supine office</b> and <b>ambulatory 24 hr / ambulatory day / ambulatory night</b> |

Risk of bias table

| <b>Bias</b>                                               | <b>Authors' judgement</b> | <b>Support for judgement</b>                  |
|-----------------------------------------------------------|---------------------------|-----------------------------------------------|
| Random sequence generation (selection bias)               | Low risk                  | Computer generation of randomization sequence |
| Allocation concealment (selection bias)                   | Low risk                  | Allocation conducted by pharmacy              |
| Blinding of participants and personnel (performance bias) | Low risk                  | Providers and participants were blinded       |
| Blinding of outcome assessment (detection bias)           | Low risk                  | Outcome assessors were blinded                |
| Incomplete outcome data (attrition bias)                  | Low risk                  | 13% loss to follow-up                         |
| Selective reporting (reporting bias)                      | Low risk                  | All outcomes reported                         |

TOHP 1992

|                      |                                                                                                                                                                                                                                                                                                                                                                                                                        |
|----------------------|------------------------------------------------------------------------------------------------------------------------------------------------------------------------------------------------------------------------------------------------------------------------------------------------------------------------------------------------------------------------------------------------------------------------|
| <b>Methods</b>       | <b>Parallel study design</b> of participants randomly assigned to weight reduction, sodium reduction, stress management or control. Conducted in the United States of America.                                                                                                                                                                                                                                         |
| <b>Participants</b>  | 744 (in control and reduced sodium groups) non-hypertensive adults not taking antihypertensive medications.                                                                                                                                                                                                                                                                                                            |
| <b>Interventions</b> | Group1 -- no intervention (control)<br>Group2 -- educational campaign to reduce sodium intake (reduced sodium)                                                                                                                                                                                                                                                                                                         |
| <b>Outcomes</b>      | Resting blood pressure<br>Number of hypertensive events                                                                                                                                                                                                                                                                                                                                                                |
| <b>Notes</b>         | 1) Sodium reduction achieved - <b>&lt;1/3 of control</b><br>- <b>&gt;2g/d in intervention</b><br>- <b>&gt; 1.2 g/d in intervention</b><br>2) Age- <b>Adult (15 yrs or greater)</b><br>3) Group - <b>Normotensive</b><br>4) Duration of follow-up (in months) - <b>18 months</b><br>5) Sex - <b>both (heterogeneous)</b><br>6) Blood pressure method - <b>manual</b><br>7) Blood pressure method - <b>seated office</b> |

Risk of bias table

| <b>Bias</b>                                               | <b>Authors' judgement</b> | <b>Support for judgement</b>                     |
|-----------------------------------------------------------|---------------------------|--------------------------------------------------|
| Random sequence generation (selection bias)               | Unclear risk              | No description of method of sequence generation. |
| Allocation concealment (selection bias)                   | Low risk                  | Concealment of allocation at a central location. |
| Blinding of participants and personnel (performance bias) | High risk                 | Providers and participants were not blinded.     |
| Blinding of outcome assessment (detection bias)           | Low risk                  | Outcome assessors were blinded                   |
| Incomplete outcome data (attrition bias)                  | Low risk                  | < 5% loss to follow-up.                          |
| Selective reporting (reporting bias)                      | Low risk                  | All outcomes reported                            |

TOHP 1997

|                      |                                                                                                                                                                                                                                                                                                                                                                                                                        |
|----------------------|------------------------------------------------------------------------------------------------------------------------------------------------------------------------------------------------------------------------------------------------------------------------------------------------------------------------------------------------------------------------------------------------------------------------|
| <b>Methods</b>       | <b>Parallel design study</b> with an intervention implemented in a 2X2 factorial design which included control, reduced sodium, weight loss, and reduced sodium/weight loss groups. Conducted in the United States of America.                                                                                                                                                                                         |
| <b>Participants</b>  | 2382 non-hypertensive adults not taking medical therapy to control blood pressure.                                                                                                                                                                                                                                                                                                                                     |
| <b>Interventions</b> | Group1 -- no intervention (control)<br>Group2 -- educational campaign to reduce sodium intake(reduced sodium)<br>Group3 -- educational campaign to reduce weight (weight loss)<br>Group4 -- educational campaign to reduce weight and sodium intake(reduced sodium/weight loss)                                                                                                                                        |
| <b>Outcomes</b>      | Resting blood pressure<br>Incidence of hypertension                                                                                                                                                                                                                                                                                                                                                                    |
| <b>Notes</b>         | 1) Sodium reduction achieved - <b>&lt;1/3 of control</b><br>- <b>&gt;2g/d in intervention</b><br>- <b>&gt; 1.2 g/d in intervention</b><br>2) Age- <b>Adult (15 yrs or greater)</b><br>3) Group - <b>Normotensive</b><br>4) Duration of follow-up (in months) - <b>36 months</b><br>5) Sex - <b>both (heterogeneous)</b><br>6) Blood pressure method - <b>manual</b><br>7) Blood pressure method - <b>seated office</b> |

Risk of bias table

| <b>Bias</b>                                               | <b>Authors' judgement</b> | <b>Support for judgement</b>                     |
|-----------------------------------------------------------|---------------------------|--------------------------------------------------|
| Random sequence generation (selection bias)               | Unclear risk              | No description of method of sequence generation. |
| Allocation concealment (selection bias)                   | Low risk                  | Concealment of allocation at a central location. |
| Blinding of participants and personnel (performance bias) | High risk                 | Providers and participants were not blinded.     |
| Blinding of outcome assessment (detection bias)           | Low risk                  | Outcome assessors were blinded.                  |
| Incomplete outcome data (attrition bias)                  | Low risk                  | < 5% loss to follow-up.                          |
| Selective reporting (reporting bias)                      | Low risk                  | All outcomes reported.                           |

|                      |                                                                                                                                                                                                                                                                                                                                                                                                                                                                                                                                                                                                                                                                          |
|----------------------|--------------------------------------------------------------------------------------------------------------------------------------------------------------------------------------------------------------------------------------------------------------------------------------------------------------------------------------------------------------------------------------------------------------------------------------------------------------------------------------------------------------------------------------------------------------------------------------------------------------------------------------------------------------------------|
| <b>Methods</b>       | <b>Cross-over design study</b> with participants randomized to reduced sodium or high sodium diet and additionally placebo, angiotensin II antagonist (losartan) or losartan and hydrochlorothiazide (HCT). Conducted in the Netherlands.                                                                                                                                                                                                                                                                                                                                                                                                                                |
| <b>Participants</b>  | 34 hypertensive adults (18-70 years) without diabetes.                                                                                                                                                                                                                                                                                                                                                                                                                                                                                                                                                                                                                   |
| <b>Interventions</b> | Group1 -- high Na diet (~200mmol/d) (control)<br>Group2 -- low Na diet (~50 mmol/d) (low Na)<br>Group3 -- high Na diet (~200mmol/d) + losartan therapy (control-L)<br>Group4 -- low Na diet (~50 mmol/d) + losartan therapy (low Na -L)<br>Group5 -- high Na diet (~200mmol/d) + losartan+ HCT therapy (control-LHCT)<br>Group6 -- low Na diet (~50 mmol/d) + losartan+ HCT therapy (low Na -LHCT)                                                                                                                                                                                                                                                                       |
| <b>Outcomes</b>      | Resting blood pressure<br>Urinary creatinine<br>Urinary urea excretion<br>Urinary protein excretion<br>Protein:creatinine ratio<br>Mean arterial pressure<br>Serum creatinine<br>Serum urea<br>Total cholesterol<br>Total serum protein<br>Serum albumin<br>Serum uric acid<br>Plasma aldosterone<br>Plasma renin<br>Aldosterone:renin ratio                                                                                                                                                                                                                                                                                                                             |
| <b>Notes</b>         | 1) Sodium reduction achieved<br>Placebo                      Losartan                      Losartan +HCT<br>- <b>&gt;1/3 of control</b> - <b>&gt;1/3 of control</b> - <b>&gt;1/3 of control</b><br>- <b>&gt;2g/d in inter.</b> - <b>&gt;2g/d in inter</b> - <b>&gt;2g/d in inter</b><br>- <b>&gt; 1.2 g/d in inter</b> - <b>&gt; 1.2 g/d in inter</b> - <b>&gt;1.2 g/d in inter</b><br>2) Age- <b>Adult (15 yrs or greater)</b><br>3) Group - <b>not specified</b><br>4) Duration of follow-up (in months) - <b>1.5 months</b><br>5) Sex - <b>both (heterogeneous)</b><br>6) Blood pressure method - <b>automatic</b><br>7) Blood pressure method - <b>seated office</b> |

Risk of bias table

| <b>Bias</b>                                               | <b>Authors' judgement</b> | <b>Support for judgement</b>                        |
|-----------------------------------------------------------|---------------------------|-----------------------------------------------------|
| Random sequence generation (selection bias)               | Low risk                  | Computer generated sequence by pharmacist.          |
| Allocation concealment (selection bias)                   | Low risk                  | Allocation completed by external pharmacist.        |
| Blinding of participants and personnel (performance bias) | High risk                 | Providers and participants were not blinded.        |
| Blinding of outcome assessment (detection bias)           | Low risk                  | Outcome assessors were blinded until data analysis. |
| Incomplete outcome data (attrition bias)                  | Low risk                  | < 5% loss to follow-up.                             |
| Selective reporting (reporting bias)                      | Low risk                  | All outcomes reported.                              |

WATT 1983

|                      |                                                                                                                                                                                                                                                                                                                                                                                                                      |
|----------------------|----------------------------------------------------------------------------------------------------------------------------------------------------------------------------------------------------------------------------------------------------------------------------------------------------------------------------------------------------------------------------------------------------------------------|
| <b>Methods</b>       | <b>Cross-over study design</b> of reduced sodium diet and participants randomized to sodium tablets or placebo tablets. Conducted in the United Kingdom.                                                                                                                                                                                                                                                             |
| <b>Participants</b>  | 20 hypertensive adults not taking medical therapy to control blood pressure.                                                                                                                                                                                                                                                                                                                                         |
| <b>Interventions</b> | Group1 -- reduced sodium diet plus 80 mmol sodium in tablets / day (control)<br>Group2 -- reduced sodium diet plus 8 placebo tablets / day (reduced sodium)                                                                                                                                                                                                                                                          |
| <b>Outcomes</b>      | Resting blood pressure<br>Arterial pressure<br>Plasma renin activity                                                                                                                                                                                                                                                                                                                                                 |
| <b>Notes</b>         | 1) Sodium reduction achieved - <u>&gt;1/3 of control</u><br>- <u>&gt;2g/d in intervention</u><br>- <u>&gt; 1.2 g/d in intervention</u><br>2) Age- <b>Adult (15 yrs or greater)</b><br>3) Group - <b>hypertensive</b><br>4) Duration of follow-up (in months) - <b>1 month</b><br>5) Sex - <b>both (heterogeneous)</b><br>6) Blood pressure method - <b>manual</b><br>7) Blood pressure method - <b>seated office</b> |

Risk of bias table

| <b>Bias</b>                                               | <b>Authors' judgement</b> | <b>Support for judgement</b>                        |
|-----------------------------------------------------------|---------------------------|-----------------------------------------------------|
| Random sequence generation (selection bias)               | Unclear risk              | No description of method of sequence generation.    |
| Allocation concealment (selection bias)                   | Unclear risk              | No description of method concealment of allocation. |
| Blinding of participants and personnel (performance bias) | Low risk                  | Providers and participants were blinded.            |
| Blinding of outcome assessment (detection bias)           | Unclear risk              | Unclear if outcome assessors were blinded           |
| Incomplete outcome data (attrition bias)                  | Low risk                  | 2 participants (10%) lost to follow-up.             |
| Selective reporting (reporting bias)                      | Low risk                  | All outcomes reported                               |

WATT 1985

|                      |                                                                                                                                                                                                                                                                                                                                                                                                                          |
|----------------------|--------------------------------------------------------------------------------------------------------------------------------------------------------------------------------------------------------------------------------------------------------------------------------------------------------------------------------------------------------------------------------------------------------------------------|
| <b>Methods</b>       | <b>Cross-over study design</b> of reduced sodium diet and participants randomized to sodium tablets or placebo tablets. Conducted in the United Kingdom.                                                                                                                                                                                                                                                                 |
| <b>Participants</b>  | 75 adults with unspecified hypertensive status and unspecified status of medical therapy to control blood pressure..                                                                                                                                                                                                                                                                                                     |
| <b>Interventions</b> | Group1 -- reduced sodium diet plus 80 mmol sodium in tablets / day (control)<br>Group2 -- reduced sodium diet plus 8 placebo tablets / day (reduced sodium)                                                                                                                                                                                                                                                              |
| <b>Outcomes</b>      | Resting blood pressure<br>Plasma renin activity                                                                                                                                                                                                                                                                                                                                                                          |
| <b>Notes</b>         | 1) Sodium reduction achieved - <b>&gt;1/3 of control</b><br>- <b>&lt; 2g / d in intervention</b><br>- <b>&gt; 1.2 g/d in intervention</b><br>2) Age- <b>Adult (15 yrs or greater)</b><br>3) Group - <b>not specified</b><br>4) Duration of follow-up (in months) - <b>1 month</b><br>5) Sex - <b>both (heterogeneous)</b><br>6) Blood pressure method - <b>manual</b><br>7) Blood pressure method - <b>seated office</b> |

Risk of bias table

| <b>Bias</b>                                               | <b>Authors' judgement</b> | <b>Support for judgement</b>                                      |
|-----------------------------------------------------------|---------------------------|-------------------------------------------------------------------|
| Random sequence generation (selection bias)               | Unclear risk              | No description of method of sequence generation.                  |
| Allocation concealment (selection bias)                   | Unclear risk              | No description of method concealment of allocation.               |
| Blinding of participants and personnel (performance bias) | Low risk                  | Providers and participants were blinded.                          |
| Blinding of outcome assessment (detection bias)           | Unclear risk              | Unclear if outcome assessors were blinded                         |
| Incomplete outcome data (attrition bias)                  | Unclear risk              | Unclear reasons for loss-to-follow or distribution of those lost. |
| Selective reporting (reporting bias)                      | Unclear risk              | All outcomes reported                                             |



WEIR 2010

|                      |                                                                                                                                                                                                                                                                                                                                                                                                                                                                                      |
|----------------------|--------------------------------------------------------------------------------------------------------------------------------------------------------------------------------------------------------------------------------------------------------------------------------------------------------------------------------------------------------------------------------------------------------------------------------------------------------------------------------------|
| <b>Methods</b>       | <b>Cross-over study design</b> with participants assigned to low or usual sodium diets. Conducted in the United States of America                                                                                                                                                                                                                                                                                                                                                    |
| <b>Participants</b>  | 132 hypertensive adults, 18 to 60 years of age all provided direct renin inhibitor, Aliskiren.                                                                                                                                                                                                                                                                                                                                                                                       |
| <b>Interventions</b> | Group1 -- usual sodium diet plus Aliskiren (control)<br>Group2 -- reduced sodium diet plus Aliskiren (reduced sodium)                                                                                                                                                                                                                                                                                                                                                                |
| <b>Outcomes</b>      | Resting blood pressure<br>24 hour ambulatory blood pressure<br>Plasma renin activity<br>Plasma aldosterone<br>Urinary creatinine excretion<br>Adverse events                                                                                                                                                                                                                                                                                                                         |
| <b>Notes</b>         | 1) Sodium reduction achieved - <b>&gt;1/3 of control</b><br>- <b>&lt; 2g / d in intervention</b><br>- <b>&gt; 1.2 g/d in intervention</b><br>2) Age- <b>Adult (15 yrs or greater)</b><br>3) Group - <b>hypertensive</b><br>4) Duration of follow-up (in months) – <b>1 month</b><br>5) Sex - <b>both (heterogeneous)</b><br>6) Blood pressure method - <b>automatic(ambulatory) / manual (office)</b><br>7) Blood pressure method - <b>seated office</b> and <b>ambulatory 24 hr</b> |

Risk of bias table

| <b>Bias</b>                                               | <b>Authors' judgement</b> | <b>Support for judgement</b>                           |
|-----------------------------------------------------------|---------------------------|--------------------------------------------------------|
| Random sequence generation (selection bias)               | Unclear risk              | No description of method of sequence generation.       |
| Allocation concealment (selection bias)                   | High risk                 | No concealment of allocation used.                     |
| Blinding of participants and personnel (performance bias) | High risk                 | Providers and participants were not blinded.           |
| Blinding of outcome assessment (detection bias)           | High risk                 | Outcome assessors were not blinded                     |
| Incomplete outcome data (attrition bias)                  | Low risk                  | Loss-to-follow up equal in diet groups and < 15% total |
| Selective reporting (reporting bias)                      | Unclear risk              | All outcomes reported                                  |

## B. Adult Cohort studies included in the systematic review reporting all-cause mortality, cardiovascular disease, stroke, or coronary heart disease

### Alderman 1995

|                      |                                                                                                                                                                                                                                                                                                                                                                                                                        |
|----------------------|------------------------------------------------------------------------------------------------------------------------------------------------------------------------------------------------------------------------------------------------------------------------------------------------------------------------------------------------------------------------------------------------------------------------|
| <b>Methods</b>       | Cohort study conducted in the USA; data taken from a union-sponsored hypertensive treatment programme                                                                                                                                                                                                                                                                                                                  |
| <b>Participants</b>  | 2937 mildly and moderately hypertensive adults; worksite-based cohort; participants given antihypertensive medical therapy as part of the programme                                                                                                                                                                                                                                                                    |
| <b>Interventions</b> | Participants had a measurement of sodium intake and were divided into sex-specific quartiles of sodium intake and incidence of CVD outcomes compared among quartiles<br>Men:<br>Quartile 1–2.1 g Na/day<br>Quartile 2–2.5 g Na/day<br>Quartile 3–3.5 g Na/day<br>Quartile 4–4.0 g Na/day<br>Women:<br>Quartile 1–1.5 g Na/day<br>Quartile 2–1.9 g Na/day<br>Quartile 3–2.7 g Na/day<br>Quartile 4–3.2 g Na/day         |
| <b>Outcomes</b>      | Stroke<br>Myocardial infarction<br>Outcome results reported for men and women separately                                                                                                                                                                                                                                                                                                                               |
| <b>Notes</b>         | Follow-up time: 3.8 year average<br>Sodium measured through 24-hour urinary sodium excretion<br>Yearly follow-up<br>Morbid and mortal events assessed through review of hospital charts and death certificates; in some rare cases, data confirmed through physicians outside the programme, family members or friends, or through union records<br>Models were unadjusted<br>Models did not adjust for blood pressure |

Na, sodium

### Risk of bias table

| Bias                                                             | Authors' judgement | Support for judgement                                                                                                                 |
|------------------------------------------------------------------|--------------------|---------------------------------------------------------------------------------------------------------------------------------------|
| <b>Selection of participants (selection bias)</b>                | Unclear risk       | Participants were volunteers with high blood pressure to participate in a union-sponsored systematic hypertension treatment programme |
| <b>Blinding of participants and personnel (performance bias)</b> | Low risk           | Personnel were blinded                                                                                                                |
| <b>Blinding of outcome assessment (detection bias)</b>           | Low risk           | Blinding of outcome assessors                                                                                                         |
| <b>Incomplete outcome data (attrition bias)</b>                  | Low risk           | Reported that there was no loss to follow-up                                                                                          |
| <b>Selective reporting (reporting bias)</b>                      | Low risk           | The reasons for not reporting some of the prespecified outcomes were explained                                                        |
| <b>Defining exposure (confounding)</b>                           | Low risk           | 24-hour urinary sodium excretion                                                                                                      |
| <b>Other confounding</b>                                         | Unclear risk       | Models were only adjusted for race and age; therefore, other potential important confounders may have influenced results              |

### Cohen 2006

|                      |                                                                                                                                                                                                                                                                                                                                                                                                                                                                                                                                                                                                                                                                          |
|----------------------|--------------------------------------------------------------------------------------------------------------------------------------------------------------------------------------------------------------------------------------------------------------------------------------------------------------------------------------------------------------------------------------------------------------------------------------------------------------------------------------------------------------------------------------------------------------------------------------------------------------------------------------------------------------------------|
| <b>Methods</b>       | Cohort study conducted in the USA; used data from NHANES II                                                                                                                                                                                                                                                                                                                                                                                                                                                                                                                                                                                                              |
| <b>Participants</b>  | 7154 men and women 30–74 years old                                                                                                                                                                                                                                                                                                                                                                                                                                                                                                                                                                                                                                       |
| <b>Interventions</b> | Measured diet and risk factors at baseline and followed for 13.7 years (mean):<br>Lower half – 1.6 g Na/day<br>Upper half – 3.7 g Na/day                                                                                                                                                                                                                                                                                                                                                                                                                                                                                                                                 |
| <b>Outcomes</b>      | Death from cardiovascular disease<br>All-cause mortality<br>Death from coronary heart disease<br>Death from stroke (cerebrovascular disease)                                                                                                                                                                                                                                                                                                                                                                                                                                                                                                                             |
| <b>Notes</b>         | Follow-up: 13.7 years (mean)<br>Sodium intake measured using one 24-hour dietary recall<br>Excluded individuals with self-reported history of heart disease or stroke, taking low-salt diet for medical reasons, those who died during ≤6 month initial follow-up, and those with the highest or lowest 1% reported intake of sodium or calories<br>Fully-adjusted models adjusted for age, sex, race, smoking, alcohol, antihypertension treatment, SBP, BMI, education, physical activity, potassium intake, history of diabetes, serum cholesterol, calories<br>Models adjusted for SBP<br>Less adjusted models (not adjusted for blood pressure) were not presented. |

BMI, body mass index; NHANES, National Health and Nutrition Examination Survey; SBP, systolic blood pressure

**Risk of bias table**

| Bias                                                             | Authors' judgement | Support for judgement                                                                                                                                                                                    |
|------------------------------------------------------------------|--------------------|----------------------------------------------------------------------------------------------------------------------------------------------------------------------------------------------------------|
| <b>Selection of participants (selection bias)</b>                | Unclear risk       | Baseline examination part of USA (NHANES) II (1976–1980); exclusion of self-reported history of heart disease or stroke                                                                                  |
| <b>Blinding of participants and personnel (performance bias)</b> | High risk          | No blinding                                                                                                                                                                                              |
| <b>Blinding of outcome assessment (detection bias)</b>           | Low risk           | Outcome was mortality                                                                                                                                                                                    |
| <b>Incomplete outcome data (attrition bias)</b>                  | Unclear risk       | Mortality statistics taken from National Death Index and Social Security Administration Death Master File and all those not reported as deceased assumed to be alive; emigration not taken into account. |
| <b>Selective reporting (reporting bias)</b>                      | Low risk           | Prespecified outcomes reported                                                                                                                                                                           |
| <b>Defining exposure (confounding)</b>                           | High risk          | Sodium measured through one 24-hour dietary recall                                                                                                                                                       |
| <b>Other confounding</b>                                         | Low risk           | Models tested for significance of other common risk factors                                                                                                                                              |

**Cohen 2008**

|                      |                                                                                                                                                                                                                                                                                                                                                                                                                                                                                                                                                                                                                                                                                                                                                  |
|----------------------|--------------------------------------------------------------------------------------------------------------------------------------------------------------------------------------------------------------------------------------------------------------------------------------------------------------------------------------------------------------------------------------------------------------------------------------------------------------------------------------------------------------------------------------------------------------------------------------------------------------------------------------------------------------------------------------------------------------------------------------------------|
| <b>Methods</b>       | Cohort study conducted in the USA; used data from NHANES III                                                                                                                                                                                                                                                                                                                                                                                                                                                                                                                                                                                                                                                                                     |
| <b>Participants</b>  | 8699 male and female adults >30 years of age                                                                                                                                                                                                                                                                                                                                                                                                                                                                                                                                                                                                                                                                                                     |
| <b>Interventions</b> | Measured diet and risk factors at baseline and followed for 8.7 years (mean):<br>Quartile 1 – 2.1 g Na/day<br>Quartile 2 – 2.5 g Na/day<br>Quartile 3 – 3.5 g Na/day<br>Quartile 4 – 4.1 g Na/day                                                                                                                                                                                                                                                                                                                                                                                                                                                                                                                                                |
| <b>Outcomes</b>      | Death from cardiovascular disease<br>All-cause mortality                                                                                                                                                                                                                                                                                                                                                                                                                                                                                                                                                                                                                                                                                         |
| <b>Notes</b>         | Follow-up 8.7 years (mean)<br>Sodium intake measured using one 24-hour dietary recall.<br>13,065 adults over 30 years of age participated in the NHANES III study; analysis excluded individuals with self-reported history of congestive heart failure, heart attack or stroke, taking low-salt diet for medical reasons, those who died during ≤6 month initial follow-up, and those with the high or low sodium or calories<br>Fully-adjusted models adjusted for age, sex, race, potassium intake, added salt, BMI, education, smoking, hypertension treatment, SBP, cholesterol, diabetes, cancer, physical activity, alcohol<br>Models adjusted for systolic blood pressure<br>Less adjusted models adjusted for age, sex, race, calories. |

BMI, body mass index; NHANES, National Health and Nutrition Examination Survey; SBP, systolic blood pressure

**Risk of bias table**

| <b>Bias</b>                                                      | <b>Authors' judgement</b> | <b>Support for judgement</b>                                                                                                                                                                            |
|------------------------------------------------------------------|---------------------------|---------------------------------------------------------------------------------------------------------------------------------------------------------------------------------------------------------|
| <b>Selection of participants (selection bias)</b>                | Unclear risk              | Baseline examination part of NHANES III (1988–1994); exclusion of self-reported history of heart disease or stroke and consumption of low salt for health reasons                                       |
| <b>Blinding of participants and personnel (performance bias)</b> | High risk                 | No blinding                                                                                                                                                                                             |
| <b>Blinding of outcome assessment (detection bias)</b>           | Low risk                  | Outcome was mortality                                                                                                                                                                                   |
| <b>Incomplete outcome data (attrition bias)</b>                  | Unclear risk              | Mortality statistics taken from National Death Index and Social Security Administration Death Master File and all those not reported as deceased assumed to be alive; emigration not taken into account |
| <b>Selective reporting (reporting bias)</b>                      | Low risk                  | Prespecified outcomes reported                                                                                                                                                                          |
| <b>Defining exposure (confounding)</b>                           | High risk                 | Sodium measured through 1–24 hour dietary recall                                                                                                                                                        |
| <b>Other confounding</b>                                         | Low risk                  | Models tested for significance of other common risk factors                                                                                                                                             |

NHANES, National Health and Nutrition Examination Survey

### Cook 2007

|                      |                                                                                                                                                                                                                                                                                                                                                                                                                                                                                                      |
|----------------------|------------------------------------------------------------------------------------------------------------------------------------------------------------------------------------------------------------------------------------------------------------------------------------------------------------------------------------------------------------------------------------------------------------------------------------------------------------------------------------------------------|
| <b>Methods</b>       | Cohort study conducted in the USA                                                                                                                                                                                                                                                                                                                                                                                                                                                                    |
| <b>Participants</b>  | 2415 (at baseline) men and women 30–54 years of age<br>Cook I = 327 and Cook II = 417                                                                                                                                                                                                                                                                                                                                                                                                                |
| <b>Interventions</b> | Cook I = randomized to low sodium or control diet and in Cook II randomized to low sodium, low sodium and weight control, weight control only or control; intervention was 18 months in Cook I and 36 months in Cook II<br><br>Subsequently all participants followed-up for a time of 10–15 years post conclusion of the interventions<br><br>Cook I:<br>low sodium – 2.29 g Na/day<br>higher sodium – 3.34 g Na/day<br><br>Cook II:<br>low sodium – 3.23 g Na/day<br>higher sodium – 4.02 g Na/day |
| <b>Outcomes</b>      | Myocardial infarction<br>Stroke<br>Coronary revascularisation<br>Cardiovascular death                                                                                                                                                                                                                                                                                                                                                                                                                |
| <b>Notes</b>         | Follow-up: 10–15 years<br>Sodium intake measured using 24-hour urinary sodium excretion<br>Fully-adjusted models adjusted for age, race, sex, weight loss, baseline weight, sodium excretion<br>Models did not adjust for blood pressures                                                                                                                                                                                                                                                            |

Na, sodium

### Risk of bias table

| <b>Bias</b>                                                      | <b>Authors' judgement</b> | <b>Support for judgement</b>                                                 |
|------------------------------------------------------------------|---------------------------|------------------------------------------------------------------------------|
| <b>Selection of participants (selection bias)</b>                | Low risk                  | Participants previously participated in RCT and selected from clinics        |
| <b>Blinding of participants and personnel (performance bias)</b> | Unclear risk              | Blinded during RCT; unclear whether personnel blinded during follow-up study |
| <b>Blinding of outcome assessment (detection bias)</b>           | Unclear risk              | Unclear whether outcome assessors blinded during follow-up study             |
| <b>Incomplete outcome data (attrition bias)</b>                  | Low risk                  | > 70% response rate after 10–15 follow-up                                    |
| <b>Selective reporting (reporting bias)</b>                      | Low risk                  | Prespecified outcomes reported                                               |
| <b>Defining exposure (confounding)</b>                           | Low risk                  | 24-hour urinary sodium excretion                                             |
| <b>Other confounding</b>                                         | Unclear risk              | Controlled for some common confounders but not all.                          |

RCT, randomized controlled trial

## Ekinci 2011

|                      |                                                                                                                                                                                                                                                                                                                                              |
|----------------------|----------------------------------------------------------------------------------------------------------------------------------------------------------------------------------------------------------------------------------------------------------------------------------------------------------------------------------------------|
| <b>Methods</b>       | Cohort study conducted in Australia                                                                                                                                                                                                                                                                                                          |
| <b>Participants</b>  | 638 patients with type 2 diabetes, mean age 64 years, 85% had hypertension (defined by the use of antihypertensive and/or blood pressure >140/90)                                                                                                                                                                                            |
| <b>Interventions</b> | Baseline measurement of sodium intake and population divided into tertiles and outcomes compared between tertiles:<br>Low tertile – <150 mmol/day<br>Middle tertile – 150–208 mmol/day<br>High tertile – >208 mmol/day                                                                                                                       |
| <b>Outcomes</b>      | All-cause mortality<br>Cardiovascular mortality                                                                                                                                                                                                                                                                                              |
| <b>Notes</b>         | Follow-up: 11 years<br>Sodium intake measured using 24-hour urinary sodium excretion<br>Fully-adjusted models adjusted for sex, pre-existing CVD, eGFR, atrial fibrillation, urinary albumin excretion rate, SBP, diabetes duration<br>Models adjusted for SBP<br>Less adjusted models (not adjusted for blood pressure) were not presented. |

CVD, cardiovascular disease; GFR, glomerular filtration rate; SBP, systolic blood pressure

## Risk of bias table

| <b>Bias</b>                                                      | <b>Authors' judgement</b> | <b>Support for judgement</b>                    |
|------------------------------------------------------------------|---------------------------|-------------------------------------------------|
| <b>Selection of participants (selection bias)</b>                | Low risk                  | 638 patients attending a single diabetes clinic |
| <b>Blinding of participants and personnel (performance bias)</b> | Unclear risk              | No blinding described                           |
| <b>Blinding of outcome assessment (detection bias)</b>           | Unclear risk              | No blinding described                           |
| <b>Incomplete outcome data (attrition bias)</b>                  | Low risk                  | Low loss to follow-up (<3%)                     |
| <b>Selective reporting (reporting bias)</b>                      | Low risk                  | Prespecified outcomes reported                  |
| <b>Defining exposure (confounding)</b>                           | Low risk                  | 24-hour urinary sodium excretion                |
| <b>Other confounding</b>                                         | Low risk                  | Controlled for other common risk factors        |

### Geleijnse CCDS2007

|                      |                                                                                                                                                                                                                                                                                                                                                                                                                                                                                                                            |
|----------------------|----------------------------------------------------------------------------------------------------------------------------------------------------------------------------------------------------------------------------------------------------------------------------------------------------------------------------------------------------------------------------------------------------------------------------------------------------------------------------------------------------------------------------|
| <b>Methods</b>       | Cohort study (case-cohort analysis) conducted in the Netherlands                                                                                                                                                                                                                                                                                                                                                                                                                                                           |
| <b>Participants</b>  | 1448 adult men and women, mean age 69.2, blood pressure status not specified, heterogeneous blood pressure medication population                                                                                                                                                                                                                                                                                                                                                                                           |
| <b>Interventions</b> | Analysis of sodium in the diet and also analysed K intake in diet and results presented as risk per 1 SD change in intake (69 mmol or 1.9 g/day)                                                                                                                                                                                                                                                                                                                                                                           |
| <b>Outcomes</b>      | Relative risk of incident MI<br>Incident stroke<br>CVD mortality<br>All-cause mortality                                                                                                                                                                                                                                                                                                                                                                                                                                    |
| <b>Notes</b>         | Follow-up: 5.5 years<br>Sodium measured by overnight urinary sodium excretion.<br>Computerized information system used by general practitioners used to quantify incident events; research physicians verified all information on incident events using records and hospital discharge letters<br>Fully-adjusted models adjusted for age, sex, sodium intake, BMI, smoking, diabetes, use of diuretics, education, calories, alcohol, calcium, saturated fat, potassium intake<br>Models did not adjust for blood pressure |

BMI, body mass index; CVD, cardiovascular disease, MI, myocardial infarction; SD, standard deviation

### Risk of bias table

| <b>Bias</b>                                                      | <b>Authors' judgement</b> | <b>Support for judgement</b>                                                                                                                                |
|------------------------------------------------------------------|---------------------------|-------------------------------------------------------------------------------------------------------------------------------------------------------------|
| <b>Selection of participants (selection bias)</b>                | Low risk                  | Participants selected from Rotterdam Study; controls were randomly selected from individuals who did not have an incident event during the follow-up period |
| <b>Blinding of participants and personnel (performance bias)</b> | High risk                 | No blinding                                                                                                                                                 |
| <b>Blinding of outcome assessment (detection bias)</b>           | Unclear risk              | No description of blinding of outcome assessor                                                                                                              |
| <b>Incomplete outcome data (attrition bias)</b>                  | Low risk                  | Reported no loss to follow-up and selected a random sample of individuals without an incident event as the control group                                    |
| <b>Selective reporting (reporting bias)</b>                      | Low risk                  | All prespecified outcomes reported                                                                                                                          |
| <b>Defining exposure (confounding)</b>                           | Low risk                  | Exposure to sodium via urinary excretion                                                                                                                    |
| <b>Other confounding</b>                                         | Low risk                  | Models controlled for other common risk factors                                                                                                             |



## He 1999

|                      |                                                                                                                                                                                                                                                                                                                                                                                                                                                                                                                                                                                                                                                                                        |
|----------------------|----------------------------------------------------------------------------------------------------------------------------------------------------------------------------------------------------------------------------------------------------------------------------------------------------------------------------------------------------------------------------------------------------------------------------------------------------------------------------------------------------------------------------------------------------------------------------------------------------------------------------------------------------------------------------------------|
| <b>Methods</b>       | Cohort study undertaken in the USA; follow-up epidemiological study on the NHANES I                                                                                                                                                                                                                                                                                                                                                                                                                                                                                                                                                                                                    |
| <b>Participants</b>  | 9485 adults 25–74 years of age during NHANES survey of 1971–75                                                                                                                                                                                                                                                                                                                                                                                                                                                                                                                                                                                                                         |
| <b>Interventions</b> | Assessment of sodium intake as well as overweight and other demographic and physiological indicators were measured at baseline and follow-up measures in 1982, 1984, 1986, 1987, and 1992:<br>Quartile 1 – 1.4 Na g/day<br>Quartile 2 – 1.7 Na g/day<br>Quartile 3 – 2.3 Na g/day<br>Quartile 4 – 2.6 Na g/day                                                                                                                                                                                                                                                                                                                                                                         |
| <b>Outcomes</b>      | Incident CVD<br>Death from CVD<br>Incident stroke<br>Death from stroke<br>Incident coronary heart disease<br>Death from coronary heart disease<br>Outcomes reported for overweight and non-overweight participants separately.                                                                                                                                                                                                                                                                                                                                                                                                                                                         |
| <b>Notes</b>         | Follow-up: 11–22 years<br>Sodium intake measured by one 24 hour dietary recall<br>Participants followed up directly<br>Death certificate required to confirm mortality and incident events required documentation for verification<br>Excluded those without exposure data, self-reported history of heart attack, heart failure, or stroke at baseline or were using a low-salt diet at baseline (n from low-salt diet =337)<br>Fully-adjusted models adjusted for age, sex, race, SBP, serum cholesterol level, diabetes, BMI, diuretic use, physical activity, education, smoking, alcohol, calories<br>Models adjusted for SBP<br>Less adjusted models adjusted for age, sex, race |

BMI, body mass index; NHANES, National Health and Nutrition Examination Survey; SBP, systolic blood pressure

### Risk of bias table

| Bias                                                             | Authors' judgement | Support for judgement                                                                                                                                                                                                                                                 |
|------------------------------------------------------------------|--------------------|-----------------------------------------------------------------------------------------------------------------------------------------------------------------------------------------------------------------------------------------------------------------------|
| <b>Selection of participants (selection bias)</b>                | Unclear risk       | Selection from NHANES would be low risk selection through multistage complex random sampling; however, excluded those without exposure data, self-reported history of heart attack, heart failure, or stroke at baseline or using a low-salt diet at baseline (n=337) |
| <b>Blinding of participants and personnel (performance bias)</b> | High risk          | No blinding                                                                                                                                                                                                                                                           |
| <b>Blinding of outcome assessment (detection bias)</b>           | Unclear risk       | Not clear whether outcome assessors were blinded                                                                                                                                                                                                                      |
| <b>Incomplete outcome data (attrition bias)</b>                  | Low risk           | 4% loss to follow-up                                                                                                                                                                                                                                                  |
| <b>Selective reporting (reporting bias)</b>                      | Low risk           | All prespecified outcomes reported                                                                                                                                                                                                                                    |
| <b>Defining exposure (confounding)</b>                           | High risk          | One 24-hour dietary recall                                                                                                                                                                                                                                            |
| <b>Other confounding</b>                                         | Low risk           | Models controlled for other common risk factors                                                                                                                                                                                                                       |

NHANES, National Health and Nutrition Examination Survey

### Kagan 1985

|                      |                                                                                                                                                                                                                                                                                                   |
|----------------------|---------------------------------------------------------------------------------------------------------------------------------------------------------------------------------------------------------------------------------------------------------------------------------------------------|
| <b>Methods</b>       | Cohort study conducted in the state of Hawaii, USA                                                                                                                                                                                                                                                |
| <b>Participants</b>  | 7088 men of Japanese ancestry living in Hawaii, USA, aged 45–68 years; all participants were free of stroke at baseline and individuals with previous CHD or cancer, or those who reported that their previous day's dietary intake was atypical, were excluded                                   |
| <b>Interventions</b> | Baseline measurement of sodium intake and population divided into quintiles and outcomes compared between quintiles:<br>Quintile 1 – 1.8 g Na/day<br>Quintile 2 – 2.1 g Na/day<br>Quintile 3 – 2.7 g Na/day<br>Quintile 4 – 3.5 g Na/day<br>Quintile 5 – 3.9 g Na/day                             |
| <b>Outcomes</b>      | Stroke<br>Stroke subtype<br>Death by stroke                                                                                                                                                                                                                                                       |
| <b>Notes</b>         | Follow-up: 10 years<br>Sodium intake measured through 24 hour dietary recall<br>Men follow-up directly and surveillance of hospital discharges and death certificates were used data collection of outcomes<br>Fully-adjusted models adjusted for age<br>Models did not adjust for blood pressure |

CHD, coronary heart disease; Na, sodium; USA, United States of America

**Risk of bias table**

| Bias                                                      | Authors' judgement | Support for judgement                                                                   |
|-----------------------------------------------------------|--------------------|-----------------------------------------------------------------------------------------|
| Selection of participants (selection bias)                | Unclear risk       | Selection of participants not clearly described                                         |
| Blinding of participants and personnel (performance bias) | Unclear risk       | Blinding not described                                                                  |
| Blinding of outcome assessment (detection bias)           | Unclear risk       | Blinding not described                                                                  |
| Incomplete outcome data (attrition bias)                  | Unclear risk       | Loss to follow-up not reported                                                          |
| Selective reporting (reporting bias)                      | Low risk           | All prespecified outcomes reported                                                      |
| Defining exposure (confounding)                           | High risk          | One 24-hour dietary recall, which did not include use of salt or soy sauce at the table |
| Other confounding                                         | High risk          | Models controlled for age only                                                          |

**Larsson CCDS2008**

|                      |                                                                                                                                                                                                                                                                                                                                                                                                                                                                                                                                                           |
|----------------------|-----------------------------------------------------------------------------------------------------------------------------------------------------------------------------------------------------------------------------------------------------------------------------------------------------------------------------------------------------------------------------------------------------------------------------------------------------------------------------------------------------------------------------------------------------------|
| <b>Methods</b>       | Cohort study conducted in Finland                                                                                                                                                                                                                                                                                                                                                                                                                                                                                                                         |
| <b>Participants</b>  | 26556 adult men, age range 50–69 at baseline, BP status not specified, not specified whether taking BP medication; all were smokers at baseline and were excluded if they had a history of cancer or other serious disease; received anticoagulant therapy; used vitamin E, A or beta-carotene supplements; self-reported having suffered stroke; or had incomplete dietary data; all participants had originally been in an RCT of smokers to assess the effect of alpha-tocopherol or beta-carotene on risk of development of lung cancer               |
| <b>Interventions</b> | Intervention: analysis of Na and K intake in diet:<br>Quintile 1 -- 97.5mmol/day (K) and 3.92 g/Na<br>Quintile 2 -- 152.1mmol/day (K) and 5.86 g/Na                                                                                                                                                                                                                                                                                                                                                                                                       |
| <b>Outcomes</b>      | All stroke (fatal and non-fatal)<br>Stroke subtypes according to quintiles of Mg, K and Na intake                                                                                                                                                                                                                                                                                                                                                                                                                                                         |
| <b>Notes</b>         | Follow-up: 13.6 years on average<br>Sodium intake measured through FFQ validated through food records<br>End-points were ascertained through record linkage with the National Hospital Discharge Register and the National Register of Causes of Death<br>Sex – men only<br>Fully-adjusted models adjusted for age, smoking, BMI, SBP, DBP, serum total cholesterol, HDL cholesterol, diabetes, history of CHD, physical activities, alcohol, calories<br>Models adjusted for SBP and DBP<br>Less adjusted models adjusted for age, supplementation group |

BMI, body mass index; BP, blood pressure; CHD, coronary heart disease; DBP, diastolic blood pressure; FFQ, Food Frequency Questionnaire; HDL, high-density lipoprotein; K, potassium; Mg, magnesium; Na, sodium; RCT, randomized controlled trial; SBP, systolic blood pressure

**Risk of bias table**

| <b>Bias</b>                                                      | <b>Authors' judgement</b> | <b>Support for judgement</b>                                                                                                                                                                                                |
|------------------------------------------------------------------|---------------------------|-----------------------------------------------------------------------------------------------------------------------------------------------------------------------------------------------------------------------------|
| <b>Selection of participants (selection bias)</b>                | High risk                 | Participants had originally agreed to participate in study on effect of alpha-tocopherol or beta-carotene on risk of development of lung cancer; all were smokers at baseline                                               |
| <b>Blinding of participants and personnel (performance bias)</b> | High risk                 | No blinding                                                                                                                                                                                                                 |
| <b>Blinding of outcome assessment (detection bias)</b>           | Unclear risk              | No description of blinding of outcome assessor                                                                                                                                                                              |
| <b>Incomplete outcome data (attrition bias)</b>                  | Unclear risk              | End points were based on record linkage with the National Hospital Discharge Register and National Register of Causes of Death. Emigration not accounted for and if record not found participant considered without outcome |
| <b>Selective reporting (reporting bias)</b>                      | Low risk                  | All prespecified outcomes reported                                                                                                                                                                                          |
| <b>Defining exposure (confounding)</b>                           | Unclear risk              | Exposure to Na via FFQ validated through comparison with food records                                                                                                                                                       |
| <b>Other confounding</b>                                         | Low risk                  | Models controlled for other common risk factors                                                                                                                                                                             |

FFQ, food frequency questionnaire; Na, sodium

### Nagata 2004

|                      |                                                                                                                                                                                                                                                                                                                                                                                                                                                                            |
|----------------------|----------------------------------------------------------------------------------------------------------------------------------------------------------------------------------------------------------------------------------------------------------------------------------------------------------------------------------------------------------------------------------------------------------------------------------------------------------------------------|
| <b>Methods</b>       | Cohort study conducted in Japan                                                                                                                                                                                                                                                                                                                                                                                                                                            |
| <b>Participants</b>  | 13,355 men and 15724 women in Takayama City, Gifu Japan ≥35 years of age                                                                                                                                                                                                                                                                                                                                                                                                   |
| <b>Interventions</b> | Usual diet including sodium intake was assessed using FFQs<br>Men:<br>Low tertile – 4.1 g/day<br>Middle tertile – 5.2 g/day<br>High tertile – 6.6 g/day<br>Women:<br>Low tertile – 3.8 g/day<br>Middle tertile – 4.8 g/day<br>High tertile – 6.0 g/day                                                                                                                                                                                                                     |
| <b>Outcomes</b>      | Death from stroke<br>Death from ischemic stroke<br>Death from intracerebral hemorrhage                                                                                                                                                                                                                                                                                                                                                                                     |
| <b>Notes</b>         | Follow-up: 7 years<br>FFQ used to measure sodium intake<br>Data presented separately for women and men<br>End-points ascertained through mandatory death registration<br>Fully-adjusted models adjusted for age, marital status, education, BMI, smoking, alcohol, exercise, hypertension, diabetes, intake of protein, total energy, potassium and vitamin E intake<br>Models did not control for blood pressure but did control for history of hypertension at baseline. |

BMI, body mass index; FFQ, food frequency questionnaire

### Risk of bias table

| <b>Bias</b>                                                      | <b>Authors' judgement</b> | <b>Support for judgement</b>                                                                                                   |
|------------------------------------------------------------------|---------------------------|--------------------------------------------------------------------------------------------------------------------------------|
| <b>Selection of participants (selection bias)</b>                | Low risk                  | All participants of city 35 years and older were eligible and participation rate at baseline was >85%                          |
| <b>Blinding of participants and personnel (performance bias)</b> | High risk                 | No blinding                                                                                                                    |
| <b>Blinding of outcome assessment (detection bias)</b>           | Low risk                  | Mortality was outcome                                                                                                          |
| <b>Incomplete outcome data (attrition bias)</b>                  | Low risk                  | <5% loss to follow-up through emigration                                                                                       |
| <b>Selective reporting (reporting bias)</b>                      | Low risk                  | Death registration required by law and all prespecified outcomes reported                                                      |
| <b>Defining exposure (confounding)</b>                           | Unclear risk              | 1-year recall FFQ used, which was validated against 3-day diet records, 4-day diet recalls and 12-day diet records over 1 year |
| <b>Other confounding</b>                                         | Low risk                  | Models controlled for other common risk factors                                                                                |

FFQ, food frequency questionnaire

### O'Donnell 2011

|                      |                                                                                                                                                                                                                                                                                                                                                                        |
|----------------------|------------------------------------------------------------------------------------------------------------------------------------------------------------------------------------------------------------------------------------------------------------------------------------------------------------------------------------------------------------------------|
| <b>Methods</b>       | Cohort study conducted in 40 countries.                                                                                                                                                                                                                                                                                                                                |
| <b>Participants</b>  | 28880 participants aged $\geq 55$ years from 733 centres from 40 countries with established CVD or high-risk diabetes mellitus; patients were ineligible if they had heart failure, low ejection fraction, significant valvular disease, serum creatinine $>3.0$ mg/dL, renal artery stenosis, nephrotic range proteinuria, or blood pressure higher than 160/100 mmHg |
| <b>Interventions</b> | Baseline measurement of sodium intake and population divided into seven subgroups and outcomes compared between subgroups<br>Subgroup 1 – $<2$ g/day<br>Subgroup 2 – 2–2.99 g/day<br>Subgroup 3 – 3–3.99 g/day<br>Subgroup 4 – 4–5.99 g/day<br>Subgroup 5 – 6–6.99 g/day<br>Subgroup 6 – 7–8 g/day<br>Subgroup 7 – $>8$ g/day                                          |
| <b>Outcomes</b>      | All-cause mortality<br>Death from CVD<br>Death from non-CVD<br>Incident MI<br>Incident congestive heart failure<br>Incident stroke                                                                                                                                                                                                                                     |
| <b>Notes</b>         | Median follow-up: 56 months (25–75 percentiles, 53–60 months)<br>24-hour sodium and potassium urinary excretion was estimated from a fasting morning urine samples<br>Fully-adjusted models are unadjusted<br>Models did not adjust for blood pressure                                                                                                                 |

CVD, cardiovascular disease; MI, myocardial infarction

**Risk of bias table**

| <b>Bias</b>                                                      | <b>Authors' judgement</b> | <b>Support for judgement</b>                                                                                                                                                                                                                                                                                                                                                              |
|------------------------------------------------------------------|---------------------------|-------------------------------------------------------------------------------------------------------------------------------------------------------------------------------------------------------------------------------------------------------------------------------------------------------------------------------------------------------------------------------------------|
| <b>Selection of participants (selection bias)</b>                | Low risk                  | Participants from other trials from 733 centres from 40 countries with established CVD or high-risk diabetes mellitus who provided a baseline urine sample; two cohorts were combined because both trials recruited participants from the same sites, time period, using the same eligibility criteria., and used the same methods to capture baseline clinical data and outcome measures |
| <b>Blinding of participants and personnel (performance bias)</b> | Unclear risk              | No description of blinding of participants and personnel                                                                                                                                                                                                                                                                                                                                  |
| <b>Blinding of outcome assessment (detection bias)</b>           | Unclear risk              | No description of blinding of outcome assessor                                                                                                                                                                                                                                                                                                                                            |
| <b>Incomplete outcome data (attrition bias)</b>                  | Low risk                  | Low loss to follow-up reported (0.2%)                                                                                                                                                                                                                                                                                                                                                     |
| <b>Selective reporting (reporting bias)</b>                      | Low risk                  | All prespecified outcomes reported                                                                                                                                                                                                                                                                                                                                                        |
| <b>Defining exposure (confounding)</b>                           | Low risk                  | 24-hour sodium urinary excretion was estimated from a fasting morning urine samples                                                                                                                                                                                                                                                                                                       |
| <b>Other confounding</b>                                         | High risk                 | Models are unadjusted                                                                                                                                                                                                                                                                                                                                                                     |

### Stolarz-Skrzypek 2011

|                      |                                                                                                                                                                                                                                                                                                                                                                                                                                                                                                                                                                        |
|----------------------|------------------------------------------------------------------------------------------------------------------------------------------------------------------------------------------------------------------------------------------------------------------------------------------------------------------------------------------------------------------------------------------------------------------------------------------------------------------------------------------------------------------------------------------------------------------------|
| <b>Methods</b>       | Cohort study conducted in Belgium and other European countries                                                                                                                                                                                                                                                                                                                                                                                                                                                                                                         |
| <b>Participants</b>  | 3681 participants without CVD from a Flemish cohort (Flemish Study on Environment, Genes, and Health Outcomes) and a cohort across Europe (European Project on Genes in Hypertension)                                                                                                                                                                                                                                                                                                                                                                                  |
| <b>Interventions</b> | Baseline measurement of sodium intake and the population was divided into tertiles and outcomes compared between tertiles<br>Low tertile – 50–126 mmol/day for women and 50–158 mmol/day for men<br>Middle tertile – 127–177 mmol/day for women and 159–221 mmol/day for men<br>High tertile – 178–400 mmol/day for women and 222–400 mmol/day for men                                                                                                                                                                                                                 |
| <b>Outcomes</b>      | All-cause mortality<br>Death from CVD<br>Death from non-CVD<br>Incident CVD<br>Incident CHD<br>Incident stroke                                                                                                                                                                                                                                                                                                                                                                                                                                                         |
| <b>Notes</b>         | Median follow-up: 7.9years<br>Sodium intake measured by 24-hour urinary sodium concentration<br>Fully-adjusted models adjusted for study population, sex and baseline variables: age, body mass index, systolic blood pressure, 24-hour urinary potassium excretion, antihypertensive drug treatment, smoking and drinking alcohol, diabetes, total cholesterol, and educational attainment<br>Models controlled for blood pressure<br>Less adjusted models, which adjusted for all covariates other than blood pressure or antihypertensive treatment, also available |

CVD, cardiovascular disease

### Risk of bias table

| Bias                                                             | Authors' judgement | Support for judgement                                                                        |
|------------------------------------------------------------------|--------------------|----------------------------------------------------------------------------------------------|
| <b>Selection of participants (selection bias)</b>                | Low risk           | Participants without cardiovascular disease selected from large Flemish and European cohorts |
| <b>Blinding of participants and personnel (performance bias)</b> | Unclear risk       | No description of blinding of participants and personnel                                     |
| <b>Blinding of outcome assessment (detection bias)</b>           | Unclear risk       | No description of blinding of outcome assessor                                               |
| <b>Incomplete outcome data (attrition bias)</b>                  | Low risk           | Reported zero loss to follow-up                                                              |
| <b>Selective reporting (reporting bias)</b>                      | Low risk           | All prespecified outcomes reported                                                           |
| <b>Defining exposure (confounding)</b>                           | Low risk           | 24-hour urinary sodium excretion                                                             |
| <b>Other confounding</b>                                         | Low risk           | Models controlled for other common risk factors                                              |



### Tunstall-Pedoe 1997

|                      |                                                                                                                                                                                                                                                                                       |
|----------------------|---------------------------------------------------------------------------------------------------------------------------------------------------------------------------------------------------------------------------------------------------------------------------------------|
| <b>Methods</b>       | Cohort study conducted in Scotland                                                                                                                                                                                                                                                    |
| <b>Participants</b>  | 11629 men and women 40– 59 years of age randomly selected from 25 districts of Scotland                                                                                                                                                                                               |
| <b>Interventions</b> | Baseline measurement of sodium intake and population divided into quintiles and outcomes compared between quintiles; K also measured<br>Quintile 1 – 1.8 g Na/day<br>Quintile 2 – 2.1 g Na/day<br>Quintile 3 – 2.7 g Na/day<br>Quintile 4 – 3.5 g Na/day<br>Quintile 5 – 3.9 g Na/day |
| <b>Outcomes</b>      | Myocardial infarction (non-fatal)<br>Coronary artery surgery<br>Death from coronary disease<br>(the sum of which was considered all coronary heart disease)<br>All-cause mortality                                                                                                    |
| <b>Notes</b>         | Follow-up: 7.6 years<br>Sodium intake measured through 24-hour urinary sodium excretion<br>Outcomes measured through death certificates and hospital/clinician records<br>Fully-adjusted models adjusted for age.<br>Models did not adjust for blood pressure                         |

K, potassium; Na, sodium

### Risk of bias table

| <b>Bias</b>                                                      | <b>Authors' judgement</b> | <b>Support for judgement</b>                                                                      |
|------------------------------------------------------------------|---------------------------|---------------------------------------------------------------------------------------------------|
| <b>Selection of participants (selection bias)</b>                | Low risk                  | Random select of clinics then patients of clinics. Selection from the Scottish Heart Health Study |
| <b>Blinding of participants and personnel (performance bias)</b> | Low risk                  | Personnel not aware of urinary sodium while conducting other measurements                         |
| <b>Blinding of outcome assessment (detection bias)</b>           | Low risk                  | Mortality was outcome and morbidity measured through hospital and clinician records               |
| <b>Incomplete outcome data (attrition bias)</b>                  | Unclear risk              | Loss to follow-up limited to emigration but amount of loss to follow-up unclear                   |
| <b>Selective reporting (reporting bias)</b>                      | Low risk                  | All prespecified outcomes reported                                                                |
| <b>Defining exposure (confounding)</b>                           | Low risk                  | 24-hour urinary sodium excretion                                                                  |
| <b>Other confounding</b>                                         | High risk                 | Models only controlled for age                                                                    |

### Tuomilehto 2001

|                      |                                                                                                                                                                                                                                                                                                                                                                                                                                                                                                                                                                                                                                                                                       |
|----------------------|---------------------------------------------------------------------------------------------------------------------------------------------------------------------------------------------------------------------------------------------------------------------------------------------------------------------------------------------------------------------------------------------------------------------------------------------------------------------------------------------------------------------------------------------------------------------------------------------------------------------------------------------------------------------------------------|
| <b>Methods</b>       | Cohort study conducted in Finland                                                                                                                                                                                                                                                                                                                                                                                                                                                                                                                                                                                                                                                     |
| <b>Participants</b>  | <p>1173 men and 1263 women 25–64 years of age; excluded from CHD analysis if had an acute coronary event (n= 34) before baseline and excluded from stroke analysis if had an acute cerebrovascular event (n=16) before baseline, but each type of patient could be included in the analysis for the other event</p> <p>Men:<br/>           Quartile 1 – 3.7 Na g/day<br/>           Quartile 2 – 4.2 Na g/day<br/>           Quartile 3 – 5.4 Na g/day<br/>           Quartile 4 – 6.0 Na g/day</p> <p>Women:<br/>           Quartile 1 – 2.7 Na g/day<br/>           Quartile 2 – 3.1 Na g/day<br/>           Quartile 3 – 4.0 Na g/day<br/>           Quartile 4 – 4.5 Na g/day</p> |
| <b>Interventions</b> | Measured sodium and other dietary exposures and other CVD risk factors at baseline                                                                                                                                                                                                                                                                                                                                                                                                                                                                                                                                                                                                    |
| <b>Outcomes</b>      | <p>Incident coronary event</p> <p>Incident stroke event</p> <p>Death from coronary heart disease</p> <p>Death from cardiovascular disease</p> <p>All-cause mortality</p>                                                                                                                                                                                                                                                                                                                                                                                                                                                                                                              |
| <b>Notes</b>         | <p>Follow-up: 8–13 years</p> <p>Sodium intake measured via 24-hour urinary sodium excretion</p> <p>End-points were measured through Statistics Finland (mortality) and national hospital discharge registers (morbidity)</p> <p>Fully-adjusted models adjusted for age, study year, smoking, serum total, HDL cholesterol, SBP, BMI</p> <p>Models adjusted for blood pressure</p> <p>Less adjusted models adjusted for age, study year</p>                                                                                                                                                                                                                                            |

BMI, body mass index; CHD, coronary heart disease; CVD, cardiovascular disease; HDL, high-density lipoprotein; Na, sodium; SBP, systolic blood pressure

**Risk of bias table**

| Bias                                                      | Authors' judgement | Support for judgement                                                            |
|-----------------------------------------------------------|--------------------|----------------------------------------------------------------------------------|
| Selection of participants (selection bias)                | Low risk           | Randomly selection sample of men and women from two eastern provinces of Finland |
| Blinding of participants and personnel (performance bias) | High risk          | No blinding                                                                      |
| Blinding of outcome assessment (detection bias)           | Low risk           | Mortality and morbidity measured through national registry systems               |
| Incomplete outcome data (attrition bias)                  | Low risk           | Participants followed through health registry system                             |
| Selective reporting (reporting bias)                      | Low risk           | All prespecified outcomes reported                                               |
| Defining exposure (confounding)                           | Low risk           | 24-hour urinary sodium                                                           |
| Other confounding                                         | Low risk           | Models controlled for other common risk factors                                  |

**Umesawa CCDS2008**

|                      |                                                                                                                                                                                                                                                                                                                                                                                                                                                |
|----------------------|------------------------------------------------------------------------------------------------------------------------------------------------------------------------------------------------------------------------------------------------------------------------------------------------------------------------------------------------------------------------------------------------------------------------------------------------|
| <b>Methods</b>       | Cohort study conducted in Japan; sample derived from 45 communities across Japan                                                                                                                                                                                                                                                                                                                                                               |
| <b>Participants</b>  | 58730 (23119 men and 35611 women) adult men and women, age range 40–79 years, blood pressure status was not specified, not specified whether taking blood pressure medication                                                                                                                                                                                                                                                                  |
| <b>Interventions</b> | Na and K intake in diet measured and quintiles compared on outcomes:<br>Quintile 1 (35mmol)K – 1.15 g Na<br>Quintile 2 (44mmol)K – 1.68 g Na<br>Quintile 3 (51mmol)K – 2.07 g Na<br>Quintile 4 (58mmol)K – 2.51 g Na<br>Quintile 5 (68mmol)K – 3.11 g Na                                                                                                                                                                                       |
| <b>Outcomes</b>      | Mortality from stroke<br>Mortality from CHD<br>Mortality total CVD                                                                                                                                                                                                                                                                                                                                                                             |
| <b>Notes</b>         | Follow-up: 12.7 year (average)<br>Sodium intake measured through FFQ<br>End points measured by death certificate<br>Fully-adjusted models adjusted for age, sex, BMI, smoking, alcohol, history of hypertension, diabetes, menopause and hormone replacement therapy (women), sports activities, walking time, education, perceived mental stress, calcium intake<br>Models did not control for BP but did control for history of hypertension |

BMI, body mass index; CHD, coronary heart disease; CVD, cardiovascular disease; FFQ, food frequency questionnaire; Na, sodium

**Risk of bias table**

| <b>Bias</b>                                                      | <b>Authors' judgement</b> | <b>Support for judgement</b>                                            |
|------------------------------------------------------------------|---------------------------|-------------------------------------------------------------------------|
| <b>Selection of participants (selection bias)</b>                | Low risk                  | Selection from Japanese Collaborative Cohort Study                      |
| <b>Blinding of participants and personnel (performance bias)</b> | Unclear risk              | Blinding not described                                                  |
| <b>Blinding of outcome assessment (detection bias)</b>           | Low risk                  | Specifically noted that those assessing death certificates were blinded |
| <b>Incomplete outcome data (attrition bias)</b>                  | Low risk                  | Loss to follow-up <5%                                                   |
| <b>Selective reporting (reporting bias)</b>                      | Low risk                  | All prespecified outcomes reported                                      |
| <b>Defining exposure (confounding)</b>                           | Unclear risk              | Exposure to sodium via dietary records                                  |
| <b>Other confounding</b>                                         | Low risk                  | Models controlled for other common risk factors                         |

### C. Children RCTs, non-RCTs and cohort studies included in the review reporting blood pressure

| Study ID                 | Country         | Study design                   | Duration | Methods of estimating sodium intake                                      | Type of intervention               | Outcome (systolic blood pressure, diastolic blood pressure) measurements                    |
|--------------------------|-----------------|--------------------------------|----------|--------------------------------------------------------------------------|------------------------------------|---------------------------------------------------------------------------------------------|
| <i>Controlled trials</i> |                 |                                |          |                                                                          |                                    |                                                                                             |
| Calabrese 1985           | USA             | RCT (parallel)                 | 12 weeks | Overnight urinary sodium and dietary assessment                          | Feeding (all water)                | Were measured on a bi-weekly basis with the first screening the week before trial beginning |
| Ellison 1989             | USA             | Non-RCT (cross-over data used) | 1 year   | Dietary assessment                                                       | Feeding (daily at boarding school) | Each student measured his/her own blood pressure each week using an automatic device        |
| Gillum 1981              | USA             | RCT (parallel)                 | 1 year   | 24-hour urinary sodium and dietary assessment                            | Diet advice or education           | Were determined at the first and one-year follow-up home visit                              |
| Howe 1985                | Australia       | Non-RCT (cross-over)           | 3 weeks  | Overnight urinary sodium and dietary assessment                          | Diet advice or education           | Were taken at baseline, three and six weeks                                                 |
| Howe 1991                | Australia       | RCT (crossover)                | 4 weeks  | Overnight urinary sodium and dietary assessment                          | Diet advice or education           | Were measured weekly                                                                        |
| Miller 1988              | USA             | Non-RCT (parallel)             | 12 weeks | 24-hour urinary sodium                                                   | Diet advice or education           | Were measured weekly                                                                        |
| Palacios 2004            | USA             | RCT (cross-over)               | 3 weeks  | 24-hour urinary sodium and dietary assessment                            | Feeding (all food)                 | Were measured every other day                                                               |
| Sinaiko 1993             | USA             | RCT (parallel)                 | 3 years  | 24-hour urinary sodium                                                   | Diet advice or education           | Were measured every 3 months                                                                |
| Trevisan 1981            | USA             | RCT (parallel)                 | 24 days  | 24-hour urinary sodium and laboratory analysis of duplicate food samples | Feeding (lunch food daily)         | Were measured on the first and the last day                                                 |
| <i>Cohort studies</i>    |                 |                                |          |                                                                          |                                    |                                                                                             |
| Geleijnse 1990           | the Netherlands | Cohort                         | 7 years  | 24-hour urinary sodium                                                   | No intervention                    | Change in blood pressure over time                                                          |

## OSM 3: Funnel plots

---

### Funnel plot 1: Resting systolic blood pressure in adults

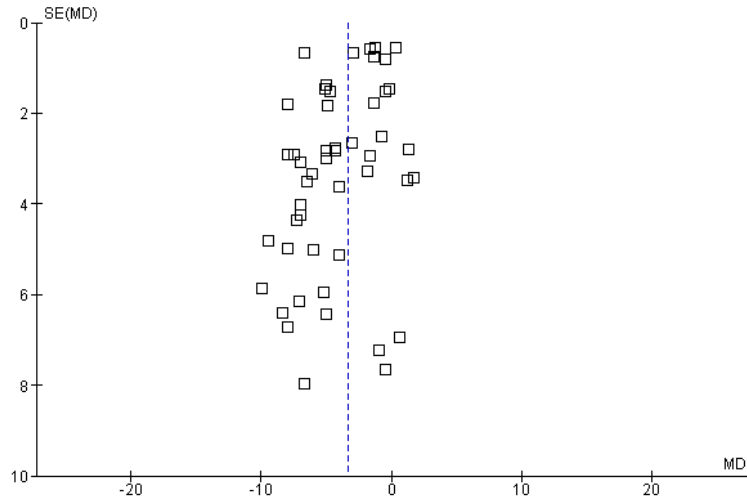

**Funnel plot 2: Resting diastolic blood pressure in adults**

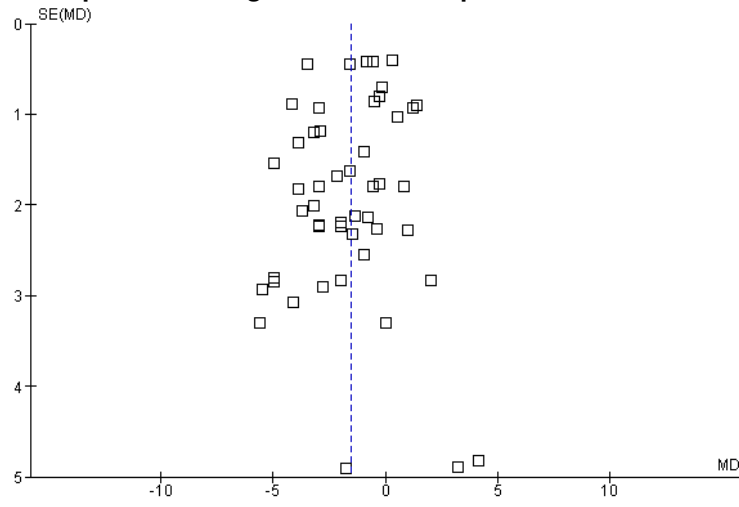

**Funnel plot 3: All-cause mortality in adults**

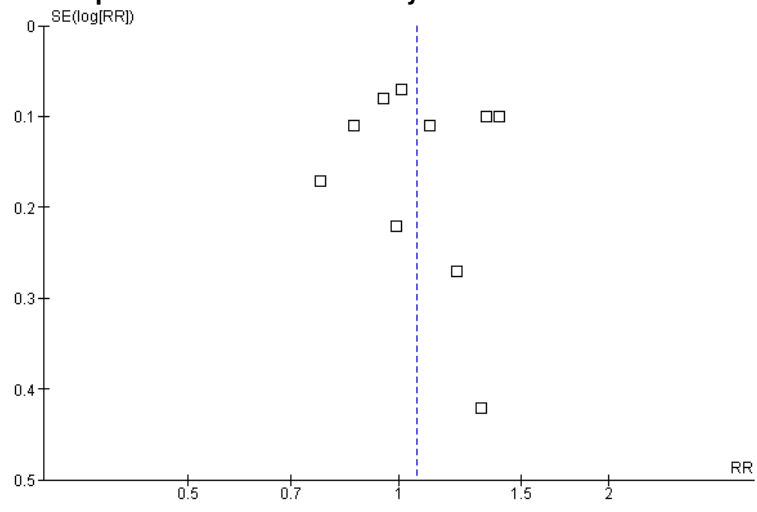



**Funnel plot 4: Cardiovascular disease in adults**

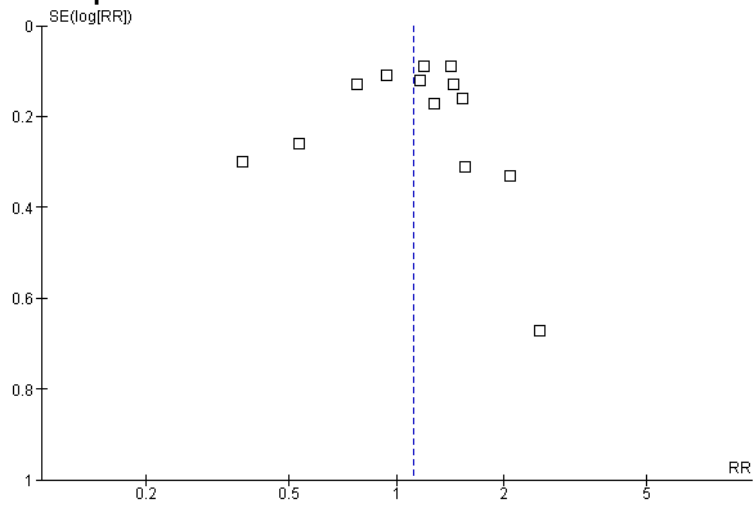

**Funnel plot 5: Stroke in adults**

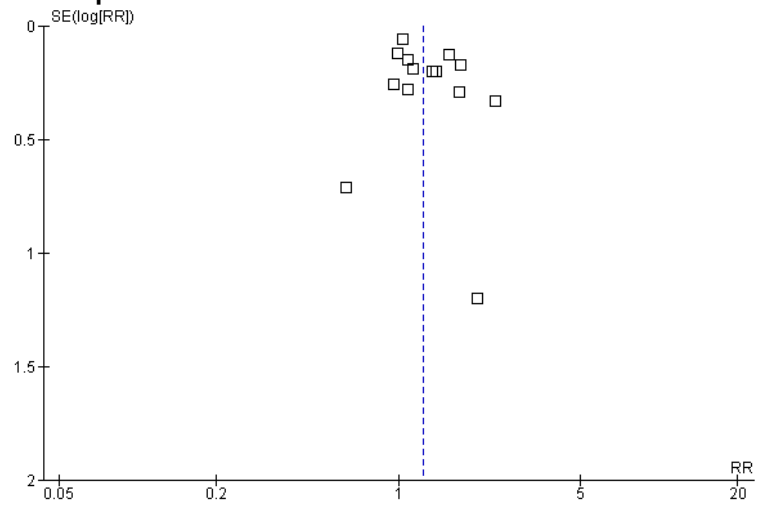

**Funnel plot 6: Coronary heart disease in adults**

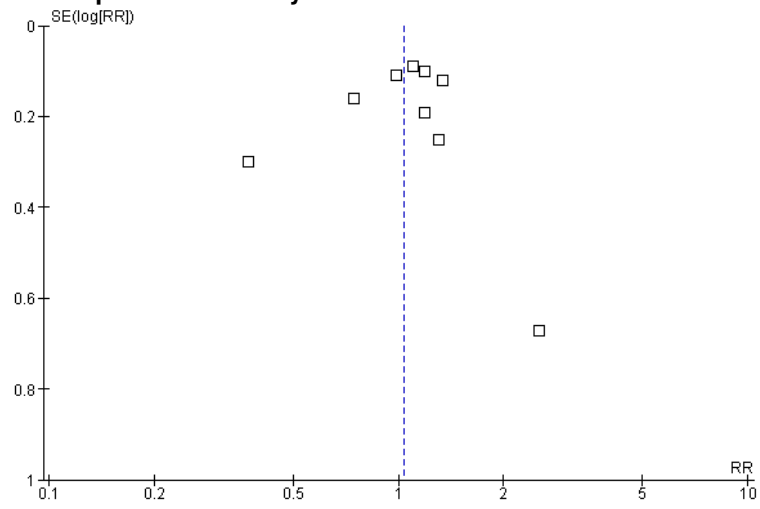

**Funnel plot 7: Systolic blood pressure in children**

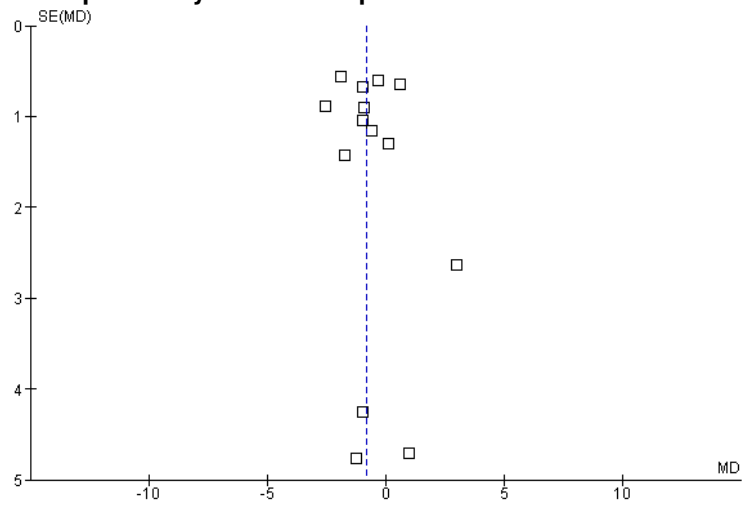

**Funnel plot 8: Diastolic blood pressure in children**

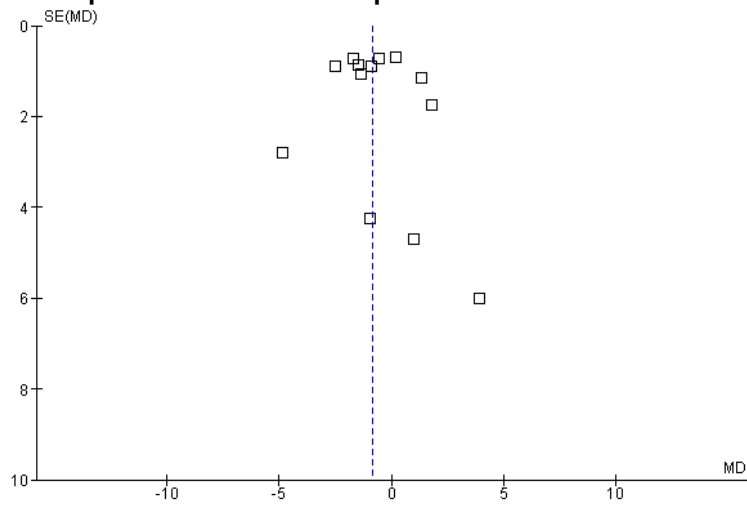

# OSM 4: Risk of bias summary

Risk of bias summary: RCTs reporting blood pressure, renal function, blood lipids, or catecholamine levels in adults

|                 | Random sequence generation (selection bias) | Allocation concealment (selection bias) | Blinding of participants and personnel (performance bias) | Blinding of outcome assessment (detection bias) | Incomplete outcome data (attrition bias) | Selective reporting (reporting bias) |
|-----------------|---------------------------------------------|-----------------------------------------|-----------------------------------------------------------|-------------------------------------------------|------------------------------------------|--------------------------------------|
| ANDERSSON 1984  | ?                                           | ?                                       | +                                                         | ?                                               | +                                        | +                                    |
| ANHMRC 1989     | ?                                           | ?                                       | ?                                                         | ?                                               | +                                        | +                                    |
| BENETOS 1992    | ?                                           | ?                                       | +                                                         | ?                                               | +                                        | +                                    |
| CAPPUCCIO 1997  | +                                           | +                                       | +                                                         | ?                                               | +                                        | +                                    |
| CHALMERS 1986   | ?                                           | ?                                       | +                                                         | ?                                               | +                                        | ?                                    |
| COBIAC 1992     | +                                           | +                                       | +                                                         | +                                               | ?                                        | +                                    |
| DASH 2001       | +                                           | +                                       | +                                                         | +                                               | +                                        | +                                    |
| DODSON 1989     | ?                                           | ?                                       | +                                                         | ?                                               | +                                        | +                                    |
| ERWTEMAN 1984   | ?                                           | ?                                       | +                                                         | +                                               | ?                                        | ?                                    |
| FAGERBERG 1984  | ?                                           | ?                                       | +                                                         | ?                                               | ?                                        | +                                    |
| FOTHERBY 1993   | ?                                           | ?                                       | +                                                         | ?                                               | +                                        | +                                    |
| GATES 2004      | ?                                           | ?                                       | +                                                         | ?                                               | +                                        | +                                    |
| GROBBEE 1987    | ?                                           | ?                                       | +                                                         | ?                                               | +                                        | +                                    |
| HE 2009         | +                                           | +                                       | +                                                         | +                                               | +                                        | +                                    |
| HOWE 1994       | +                                           | +                                       | +                                                         | +                                               | ?                                        | +                                    |
| MACGREGOR 1982  | ?                                           | ?                                       | +                                                         | ?                                               | +                                        | +                                    |
| MACGREGOR 1989  | ?                                           | ?                                       | +                                                         | ?                                               | +                                        | +                                    |
| MCCARRON 1997   | +                                           | ?                                       | +                                                         | +                                               | +                                        | +                                    |
| MELAND 1997     | ?                                           | ?                                       | +                                                         | +                                               | +                                        | +                                    |
| MELAND 2009     | ?                                           | ?                                       | +                                                         | +                                               | +                                        | +                                    |
| MELANDER 2007   | ?                                           | ?                                       | +                                                         | ?                                               | +                                        | +                                    |
| MORGAN 1981     | ?                                           | ?                                       | +                                                         | +                                               | ?                                        | +                                    |
| MUHLHAUSER 1996 | +                                           | ?                                       | +                                                         | +                                               | +                                        | +                                    |
| NESTEL 1993     | ?                                           | ?                                       | +                                                         | ?                                               | +                                        | +                                    |
| PARIJS 1973     | ?                                           | +                                       | +                                                         | +                                               | +                                        | +                                    |
| PUSKA 1983      | ?                                           | ?                                       | +                                                         | +                                               | +                                        | +                                    |
| RICHARDS 1984   | ?                                           | ?                                       | +                                                         | ?                                               | +                                        | +                                    |
| RUPPERT 1993    | ?                                           | ?                                       | +                                                         | +                                               | +                                        | +                                    |
| SCIARRONE 1992  | +                                           | +                                       | +                                                         | +                                               | +                                        | +                                    |
| SILMAN 1983     | ?                                           | ?                                       | +                                                         | ?                                               | +                                        | +                                    |
| SUCKLING 2010   | ?                                           | ?                                       | ?                                                         | ?                                               | ?                                        | ?                                    |
| SWIFT 2005      | ?                                           | ?                                       | +                                                         | +                                               | +                                        | +                                    |
| TOHP 1992       | ?                                           | +                                       | +                                                         | +                                               | +                                        | +                                    |
| TOHP 1997       | ?                                           | +                                       | +                                                         | +                                               | +                                        | +                                    |
| VOGT 2008       | +                                           | ?                                       | +                                                         | +                                               | +                                        | +                                    |
| WATT 1983       | ?                                           | ?                                       | +                                                         | ?                                               | +                                        | +                                    |
| WATT 1985       | ?                                           | ?                                       | +                                                         | ?                                               | ?                                        | ?                                    |
| WEIR 2010       | ?                                           | +                                       | +                                                         | +                                               | +                                        | ?                                    |

**Risk of bias summary: Cohort studies reporting all-cause mortality, cardiovascular disease, stroke, or coronary heart disease in adults**

|                       | Selection of participants (selection bias) | Blinding of participants and personnel (performance bias) | Blinding of outcome assessment (detection bias) | Incomplete outcome data (attrition bias) | Selective reporting (reporting bias) | Defining exposure (confounding) | Other confounding |
|-----------------------|--------------------------------------------|-----------------------------------------------------------|-------------------------------------------------|------------------------------------------|--------------------------------------|---------------------------------|-------------------|
| ALDERMAN 1995         | ?                                          | +                                                         | +                                               | +                                        | +                                    | +                               | ?                 |
| COHEN 2006            | ?                                          | -                                                         | +                                               | ?                                        | +                                    | -                               | +                 |
| COHEN 2008            | ?                                          | -                                                         | +                                               | ?                                        | +                                    | -                               | +                 |
| COOK 2007             | +                                          | ?                                                         | ?                                               | +                                        | +                                    | +                               | ?                 |
| EKINCI 2011           | ?                                          | ?                                                         | ?                                               | +                                        | +                                    | +                               | +                 |
| GELEIJNSE CCDS2007    | +                                          | -                                                         | ?                                               | +                                        | +                                    | +                               | +                 |
| HE 1999               | ?                                          | -                                                         | ?                                               | +                                        | +                                    | -                               | +                 |
| KAGAN 1985            | ?                                          | ?                                                         | ?                                               | ?                                        | +                                    | -                               | -                 |
| LARSSON CCDS2008      | -                                          | -                                                         | ?                                               | ?                                        | +                                    | ?                               | +                 |
| NAGATA 2004           | +                                          | -                                                         | +                                               | +                                        | +                                    | ?                               | +                 |
| O'DONNELL 2011        | +                                          | ?                                                         | ?                                               | +                                        | +                                    | +                               | -                 |
| STOLARZ-SKRZYPEK 2011 | +                                          | ?                                                         | ?                                               | +                                        | +                                    | +                               | +                 |
| TUNSTALL-PEDOE 1997   | +                                          | +                                                         | +                                               | ?                                        | +                                    | +                               | -                 |
| TUOMILEHTO 2001       | +                                          | -                                                         | +                                               | +                                        | +                                    | +                               | +                 |
| UMESAWA CCDS2008      | +                                          | ?                                                         | +                                               | +                                        | +                                    | ?                               | +                 |

**Risk of bias summary: Controlled-trials and one cohort study reporting blood pressure in children**

|                      | Random sequence generation (selection bias) | Allocation concealment (selection bias) | Blinding of participants and personnel (performance bias) | Blinding of outcome assessment (detection bias) | Incomplete outcome data (attrition bias) | Selective reporting (reporting bias) | Other bias |
|----------------------|---------------------------------------------|-----------------------------------------|-----------------------------------------------------------|-------------------------------------------------|------------------------------------------|--------------------------------------|------------|
| Calabrese 1985M      | +                                           | -                                       | +                                                         | +                                               | +                                        | +                                    | ?          |
| Calabrese 1985W      | +                                           | -                                       | +                                                         | +                                               | +                                        | +                                    | +          |
| Ellison 1989M        | +                                           | -                                       | -                                                         | -                                               | +                                        | +                                    | -          |
| Ellison 1989W        | +                                           | -                                       | -                                                         | -                                               | +                                        | +                                    | -          |
| Gillum 1981MW        | +                                           | -                                       | -                                                         | ?                                               | +                                        | +                                    | ?          |
| Howe 1985M           | +                                           | -                                       | -                                                         | -                                               | +                                        | +                                    | ?          |
| Howe 1985W           | +                                           | -                                       | -                                                         | -                                               | +                                        | +                                    | ?          |
| Howe 1991MW          | ?                                           | ?                                       | ?                                                         | ?                                               | +                                        | +                                    | ?          |
| Miller 1988MW        | ?                                           | +                                       | ?                                                         | -                                               | -                                        | +                                    | ?          |
| Palacios 2004W Black | ?                                           | ?                                       | ?                                                         | ?                                               | -                                        | +                                    | ?          |
| Palacios 2004W White | ?                                           | ?                                       | ?                                                         | ?                                               | -                                        | +                                    | ?          |
| Sinaiko 1993M        | +                                           | ?                                       | +                                                         | ?                                               | ?                                        | -                                    | ?          |
| Sinaiko 1993W        | +                                           | ?                                       | +                                                         | ?                                               | ?                                        | -                                    | ?          |
| Trevisan 1981MW      | ?                                           | -                                       | -                                                         | -                                               | -                                        | +                                    | ?          |
| Tuthill1985W         | ?                                           | +                                       | +                                                         | ?                                               | +                                        | -                                    | ?          |



## OSM 5: Risk of bias graph

### Risk of bias graph: RCTs reporting blood pressure, renal function, blood lipids, or catecholamine levels in adults

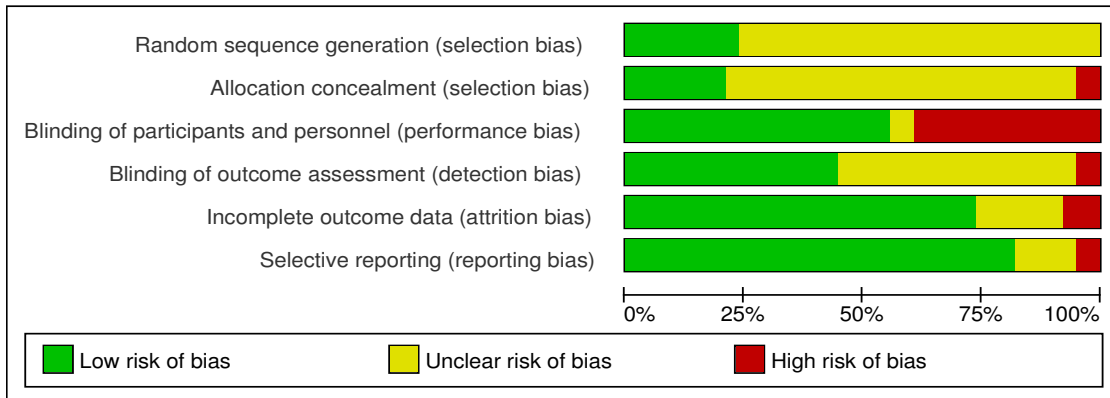

### Risk of bias graph: Cohort studies reporting all-cause mortality, cardiovascular disease, stroke, or coronary heart disease in adults

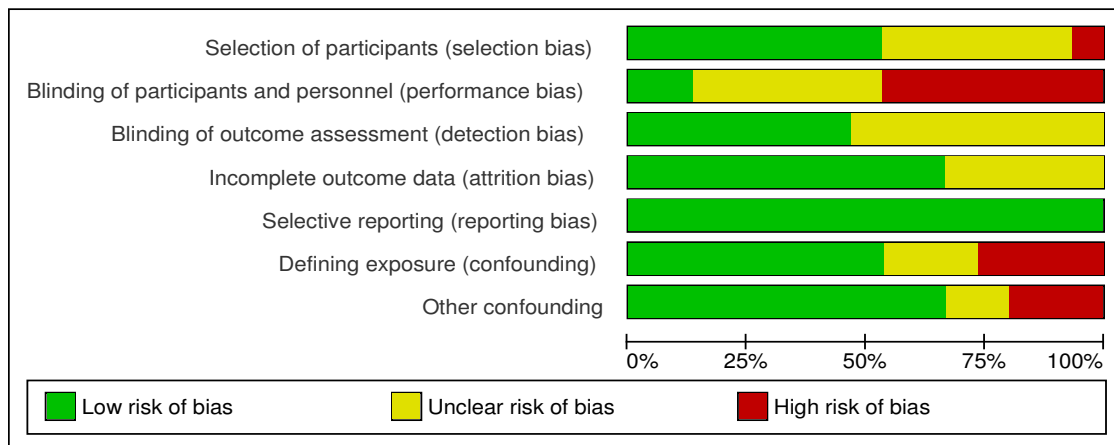

**Risk of bias graph: Controlled-trials and one cohort study reporting blood pressure in children**

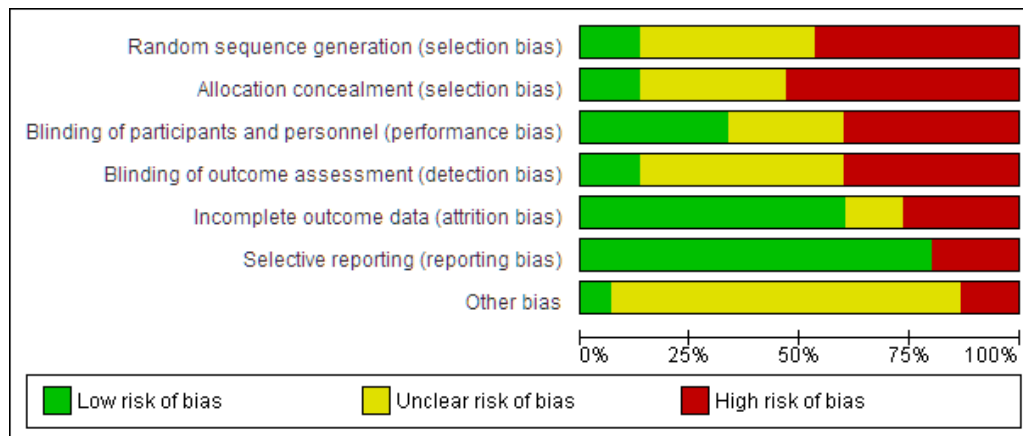

Supplement: abun007380.www.pdf [file abun007380.www.pdf]
